# Supplementary material for: Fever therapy in febrile adults: systematic review with meta-analyses and trial sequential analyses
Source: PubMed Central journal article supplement — BMJ. 2022 Jul 12;378:e069620. doi: 10.1136/bmj-2021-069620 (PMC9274300; doi:10.1136/bmj-2021-069620), 2022-07-12
Supplement: holj069620.ww1.pdf [file holj069620.ww1.pdf]

# **Fever therapy in febrile adults: systematic review with meta-analyses and trial sequential analyses**

## **Supplementary materials**

### **Authors**

Johan Holgersson<sup>1</sup>, Ameldina Ceric<sup>1</sup>, Naqash Sethi<sup>2</sup>, Niklas Nielsen<sup>1</sup> and Janus Jakobsen<sup>2,3</sup>

## Appendix

|                                                                                                                                                                                                                                |           |
|--------------------------------------------------------------------------------------------------------------------------------------------------------------------------------------------------------------------------------|-----------|
| <b>SUPPLEMENTARY METHODS</b> .....                                                                                                                                                                                             | <b>3</b>  |
| <b>SUPPLEMENTARY RESULTS</b> .....                                                                                                                                                                                             | <b>7</b>  |
| <b>FIGURES</b> .....                                                                                                                                                                                                           | <b>10</b> |
| FIGURE S1: PRISMA FLOW DIAGRAM .....                                                                                                                                                                                           | 10        |
| FIGURE S2: FIXED-EFFECTS META-ANALYSIS OF FEVER THERAPY VERSUS CONTROL INTERVENTIONS ON ALL-CAUSE MORTALITY.....                                                                                                               | 11        |
| FIGURE S3: SUBGROUP ANALYSIS OF ALL-CAUSE MORTALITY COMPARING DIFFERENT INTERVENTION TYPES .....                                                                                                                               | 12        |
| FIGURE S4: SUBGROUP ANALYSIS OF ALL-CAUSE MORTALITY COMPARING CRITICALLY ILL VERSUS NON-CRITICALLY ILL .....                                                                                                                   | 13        |
| FIGURE S5: SUBGROUP ANALYSIS OF ALL-CAUSE MORTALITY COMPARING INFECTIOUS FEVER WITH NON-INFECTIOUS FEVER.....                                                                                                                  | 14        |
| FIGURE S6: SUBGROUP ANALYSIS OF ALL-CAUSE MORTALITY COMPARING DIFFERENT CONTROL INTERVENTIONS .....                                                                                                                            | 15        |
| FIGURE S7: SUBGROUP ANALYSIS OF ALL-CAUSE MORTALITY COMPARING TRIALS WITH SIGNIFICANTLY LOWER TEMPERATURE IN FEVER THE FEVER THERAPY GROUP WITH TRIALS WITH NON-SIGNIFICANTLY LOWER TEMPERATURE IN THE FEVER THERAPY GROUP     | 16        |
| FIGURE S8: SUBGROUP ANALYSIS OF ALL-CAUSE MORTALITY COMPARING DIFFERENT FOLLOW-UP TIMES .....                                                                                                                                  | 17        |
| FIGURE S9: SUBGROUP ANALYSIS OF ALL-CAUSE MORTALITY COMPARING TRIALS WITH FOR PROFIT BIAS WITH TRIALS WITHOUT FOR-PROFIT BIAS.....                                                                                             | 19        |
| FIGURE S10: SUBGROUP ANALYSIS OF ALL-CAUSE MORTALITY COMPARING TRIALS WITH DIFFERENT LEVELS OF RISK OF BIAS.....                                                                                                               | 20        |
| FIGURE S11: FIXED-EFFECTS META-ANALYSIS OF FEVER THERAPY VERSUS CONTROL INTERVENTIONS ON SERIOUS ADVERSE EVENTS .....                                                                                                          | 21        |
| FIGURE S12: SUBGROUP ANALYSIS OF SERIOUS ADVERSE EVENTS COMPARING DIFFERENT INTERVENTION TYPES .....                                                                                                                           | 22        |
| FIGURE S13: SUBGROUP ANALYSIS OF SERIOUS ADVERSE EVENTS COMPARING CRITICALLY ILL VERSUS NON-CRITICALLY ILL .....                                                                                                               | 23        |
| FIGURE S14: SUBGROUP ANALYSIS OF SERIOUS ADVERSE EVENTS COMPARING INFECTIOUS FEVER WITH NON-INFECTIOUS FEVER .                                                                                                                 | 24        |
| FIGURE S15: SUBGROUP ANALYSIS OF SERIOUS ADVERSE EVENTS COMPARING DIFFERENT CONTROL INTERVENTIONS.....                                                                                                                         | 25        |
| FIGURE S16: SUBGROUP ANALYSIS OF SERIOUS ADVERSE EVENTS COMPARING TRIALS WITH SIGNIFICANTLY LOWER TEMPERATURE IN FEVER THE FEVER THERAPY GROUP WITH TRIALS WITH NON-SIGNIFICANTLY LOWER TEMPERATURE IN THE FEVER THERAPY GROUP | 26        |
| FIGURE S17: SUBGROUP ANALYSIS OF SERIOUS ADVERSE EVENTS COMPARING DIFFERENT FOLLOW-UP TIMES .....                                                                                                                              | 27        |
| FIGURE S18: SUBGROUP ANALYSIS OF SERIOUS ADVERSE EVENTS COMPARING TRIALS WITH FOR PROFIT BIAS WITH TRIALS WITHOUT FOR-PROFIT BIAS .....                                                                                        | 29        |
| FIGURE S19: SUBGROUP ANALYSIS OF SERIOUS ADVERSE EVENTS COMPARING TRIALS WITH DIFFERENT LEVELS OF RISK OF BIAS ...                                                                                                             | 30        |
| FIGURE S20: RANDOM-EFFECTS META-ANALYSIS OF FEVER THERAPY VERSUS CONTROL INTERVENTIONS ON NON-SERIOUS ADVERSE EVENTS.....                                                                                                      | 31        |
| FIGURE S21: TRIAL SEQUENTIAL ANALYSIS OF FEVER THERAPY VERSUS CONTROL INTERVENTIONS ON NON-SERIOUS ADVERSE EVENTS .....                                                                                                        | 32        |
| FIGURE S22: FIXED-EFFECTS META-ANALYSIS OF FEVER THERAPY VERSUS CONTROL INTERVENTIONS ON NON-SERIOUS ADVERSE EVENTS.....                                                                                                       | 33        |
| FIGURE S23: SUBGROUP ANALYSIS OF NON-SERIOUS ADVERSE EVENTS COMPARING DIFFERENT INTERVENTION TYPES.....                                                                                                                        | 34        |
| FIGURE S24: SUBGROUP ANALYSIS OF NON-SERIOUS ADVERSE EVENTS COMPARING CRITICALLY ILL VERSUS NON-CRITICALLY ILL...                                                                                                              | 35        |
| FIGURE S25: SUBGROUP ANALYSIS OF NON-SERIOUS ADVERSE EVENTS COMPARING INFECTIOUS FEVER WITH NON-INFECTIOUS FEVER.....                                                                                                          | 36        |
| FIGURE S26: SUBGROUP ANALYSIS OF NON-SERIOUS ADVERSE EVENTS COMPARING DIFFERENT FOLLOW-UP TIMES.....                                                                                                                           | 37        |
| FIGURE S27: SUBGROUP ANALYSIS OF NON-SERIOUS ADVERSE EVENTS COMPARING TRIALS WITH FOR PROFIT BIAS WITH TRIALS WITHOUT FOR-PROFIT BIAS .....                                                                                    | 38        |
| <b>TABLES</b> .....                                                                                                                                                                                                            | <b>39</b> |
| TABLE S1: CHARACTERISTICS OF INCLUDED TRIALS .....                                                                                                                                                                             | 39        |
| TABLE S2: SUMMARY OF SERIOUS ADVERSE EVENTS IN THE INCLUDED TRIALS .....                                                                                                                                                       | 42        |
| TABLE S3: SUMMARY OF FINDINGS TABLE OF FEVER THERAPY VERSUS CONTROL INTERVENTIONS .....                                                                                                                                        | 43        |
| <b>REFERENCES</b> .....                                                                                                                                                                                                        | <b>44</b> |

## Supplementary methods

CENTRAL, BIOSIS, CINAHL, MEDLINE, Embase, LILACS, Scopus and Web of Science Core Collection were searched to identify relevant trials.<sup>1</sup> Databases were searched from their inception to July 2<sup>nd</sup> 2021.

Randomized clinical trials with adults irrespective of age, sex and comorbidities diagnosed with fever (as defined by trialists) or hyperthermia (as defined by trialists) were included. Trials had to compare fever therapy with no fever therapy (with or without placebo/ sham). Fever therapy was defined as any treatment or combination of treatments given with the intention to reduce core body temperature, e.g., physical cooling and antipyretic drugs.<sup>1</sup> Any co-intervention was allowed if the co-intervention was planned to be delivered similarly in the compared groups.

### Primary outcomes

- All-cause mortality
- Serious adverse events, defined as any untoward medical occurrence that resulted in death, was life-threatening, required hospitalization or prolongation of existing hospitalization, resulted in persistent or significant disability or jeopardized the patient.<sup>2</sup> Expecting the reporting of serious adverse events to be heterogeneous and not strictly according to the 'International Council for Harmonization of Technical Requirements for Registration of Pharmaceuticals for Human Use - Good Clinical Practice' (ICH-GCP) recommendations in many trials, serious adverse events were included if the trialists either: (1) used the term 'serious adverse event' but did not refer to ICH-GCP, or (2) reported the proportion of participants with an event we considered fulfilling the ICH-GCP definition. Serious adverse events were considered as any untoward medical occurrence that at any dose:
  - results in death,
  - is life-threatening,
  - requires inpatient hospitalization or prolongation of existing hospitalization,
  - results in persistent or significant disability or incapacity or
  - is a congenital anomaly/birth defect

If several such events were reported, then the highest proportion reported in each trial was chosen.

#### Secondary outcomes

- Quality of life measured on any valid continuous scale
- Non-serious adverse event defined as those leading to discontinuation of the intervention or defined as ‘adverse events’ by the trialists. Each adverse event was, if possible, analysed separately.

#### Exploratory outcomes

- Resolution of fever (as defined by the trialists).
- Temperature change (measured by body temperature).
- Number of serious adverse events (analysed as count data).
- Number of non-serious adverse events (analysed as count data).

Two authors (JH + AC) independently reviewed and extracted the data for each trial using a data extraction sheet. Following independent data extraction, the authors conducted a meeting to discuss any discrepancies, disagreements were resolved by a third reviewer (JCJ) or by consensus. All trial authors were contacted in attempt to obtain information if there was missing or unclear data.

Assessing the risk of bias two authors (JH + AC) independently reviewed the trials using the instructions given in the *Cochrane Handbook for Systematic Reviews of Interventions* evaluating the methodology in respect of: random sequence generation, allocation concealment, blinding of participants and personnel, blinding of outcome assessment, incomplete outcome data, selective outcome reporting and other risks of bias.<sup>3</sup> The second version of the Cochrane risk-of-bias tool for randomized trials (RoB2) was used to assess risk of bias.<sup>4</sup> Each domain was assessed according to a three-step nominal scale: low risk of bias, some concerns, and high risk of bias. The overall risk of bias for a trial was classified as low risk of bias if all domains were assessed to be low risk of bias, of some concern if one or more domain were assessed as of some concern but no domain assessed as high risk of bias, and high risk of bias if any domain was assessed to be at high risk of bias. Trials at high risk of bias tend to overestimate beneficial effects and underestimate harmful effects.<sup>5-11</sup>

For dichotomous outcomes, risk ratios (RR) with 95% confidence intervals were calculated in the meta-analyses. Additionally, trial sequential analysis adjusted confidence intervals (CIs) were calculated using the trial sequential analysis program.<sup>12,13</sup> Fisher's exact test was used to calculate the risk ratio for single trial results.

We planned to handle missing data following the eight-step procedure suggested by Jakobsen *et al.* Providing that missing data constituted  $\geq 5\%$  of the overall data, the impact of missing data was evaluated through a "best-worst-case" scenario and a "worst-best-case" scenario. In the "best-worst-case" scenario it is assumed that all participants lost to follow-up in the experimental group had a beneficial outcome and those lost to follow-up in the control group had a harmful outcome and in the "worst-best-case" scenario it is assumed that all participants lost to follow-up in the experimental group had a harmful outcome and all those lost to follow-up in the control group had a beneficial outcome. These sensitivity analyses reveal the range of uncertainty due to missing data.<sup>14</sup>

Heterogeneity was primarily assessed through visual inspection of forest plots assessing the dispersion of trials across the combined effect estimate and secondarily through the  $I^2$  statistic.<sup>3</sup> The threshold for interpretation of the  $I^2$  statistic used the overlapping scale:

- 0 to 40%: might not be important;
- 30 to 60%: may represent moderate heterogeneity;
- 50 to 90%: may represent substantial heterogeneity;
- 75 to 100%: considerable heterogeneity

Heterogeneity was further investigated through relevant subgroup analyses. Funnel plots were used to visually assess reporting bias in meta-analyses including  $\geq 10$  trials.<sup>15,16</sup>

### **Data synthesis**

Meta-analyses were performed following the *Cochrane Handbook of Systematic Reviews of Interventions*, Keus *et al.* and Jakobsen *et al.* Stata version 16 (StataCorp LLC, College Station, TX, USA) was used to analyse the data.<sup>3,14,17,18</sup> Meta-analyses were performed using both fixed-effects (Mantel-Haenszel) and random-effects (DerSimonian-Laird) model to assign weight to the trials.<sup>19,20</sup> The model providing the most conservative result (highest p-

value) was chosen as the primary result, the less conservative result was considered a sensitivity analysis.<sup>18</sup> In the presence of statistical heterogeneity, a random-effects model is considered superior to a fixed-effect model but if one or two trial accounts for approximately 80 % or more of the total weight then a fixed-effect model is considered superior as a random-effects model could provide erroneous results.<sup>3</sup> The most correct and precise result is provided in the absence of heterogeneity where the two models converge and show identical results.

Multiple outcomes have major implications on the interpretation of confidence intervals and p-values due to an increased risk of false declaration of the effectiveness of an assessed intervention (type I error). To adjust the thresholds for statistical significance according to the number of outcome comparisons, a conservative approach was used dividing the pre-defined p-value threshold with the value halfway between one (no adjustment) and the number of primary outcome comparisons (Bonferroni adjustment).<sup>18</sup> A multiplicity adjusted p-value of  $\leq 0.02$  was set as threshold of statistical significance due to four primary and secondary outcomes being assessed.<sup>18</sup> The eight-step procedure suggested by Jakobsen et al was used to assess the clinical significance of the results.<sup>18</sup>

Trial sequential analyses were performed using software version 0.9.5.10 Beta (CTU, Copenhagen, Denmark) in attempt to reduce the risks of type I & II errors.<sup>13,21-30</sup> The trial sequential analysis manual was followed to estimate diversity-adjusted required information size (DARIS) and cumulative Z-curve's breach of the trial sequential monitoring boundaries.<sup>13</sup> The required information size was based on the cumulative portion of participants with events relative to all participants in the group, a relative risk reduction or increase of 25% as suggested by GRADE authors as default threshold, an alpha of 2% ( $p = 0.02$ ) for all outcomes, a beta of 10% (90% power) and the diversity of the trials in the meta-analysis<sup>18,27,31</sup>. We investigated and defined the lowest effect estimate that could be confirmed or rejected using trial sequential analyses.

Subgroup analyses were performed, using Stata version 16 (StataCorp LLC, College Station, TX, USA).<sup>14</sup> Subgroup analyses were performed to investigate heterogeneity between trials and to be hypothesis-generating for further studies. Multiple analyses increase the risk of type I errors and further interpretation of the subgroup analyses results should be done with caution. We planned the following subgroup analyses:

- Comparison of different types of fever therapies
- Critically ill compared to non-critically ill participants
- Participants with infectious fever compared to non-infectious fever
- Comparison of different follow-up time points
- Comparison of different control interventions
- Comparison of different funding resources (industry funded or unknown funding/ non-industry funding)

We performed a post hoc subgroup analysis comparing trials with a statistically significant temperature difference between the compared groups to trials with a non-significant temperature difference.

The approach proposed by the Grading of Recommendations, Assessment, Development and Evaluation (GRADE) working group was used for rating the certainty of the evidence.<sup>32-34</sup> Five domains were assessed: risk of bias, inconsistency, indirectness, imprecision, and publication bias. The evidence was rated to be either of high certainty, moderate certainty, low certainty, or very low certainty.<sup>32-34</sup>

## Supplementary results

### Quality of life

There was only one trial presenting data on quality of life. Using the EQ-5D-5L descriptive system comprising of the five dimensions of health (mobility, self-care, usual activities, pain and discomfort, and anxiety and depression) at 24, 48 and 72 hours the trial authors concluded that there was no significant difference in quality of life between paracetamol and placebo group and that further studies are needed to reveal a potential difference.<sup>35</sup>

### Non-serious adverse events

Four trials (6 comparisons) with a total of 767 participants reported on non-serious adverse events. The included trials assessed the effects of three different fever therapy interventions: ibuprofen versus placebo<sup>36,37</sup> (2 trials), acetaminophen versus placebo<sup>38</sup> (1 trial), and sulindac versus placebo<sup>39</sup> (1 trial). 455/767 participants were hospitalised, and 453/767 were non-critically ill (Table S1). One trial included both critically ill and non-critically ill participants (314/767) (Table S1). 392/767 had infectious fever and 61/767 had non-infectious

fever (Table S1). For 120/767 participants the origin of fever was unknown (Table S1). A total of 137 trial participants out of 329 (41.6%) had a non-serious adverse event in the fever therapy group compared with 57 of 244 (23.4%) in the control group.

Meta-analysis of non-serious adverse events did not show evidence of a difference (RR 0.92; 95% CI 0.67 to 1.25;  $I^2=66.50\%$ ;  $p=0.58$ , 4 trials; very low certainty evidence) (Figure S20, Table 3). Quantitative measures of heterogeneity ( $I^2=66.50\%$ ) combined with visual inspection of the forest plot revealed signs of significant heterogeneity (Figure S20). Trial sequential analysis showed that we could neither confirm nor reject that fever therapy reduced the relative risk of non-serious adverse events by 25% (Figure S21). This outcome result was assessed as high risk of bias and the certainty of the evidence was assessed as very low (Table 3). The certainty of the evidence was downgraded three levels due to considerable risk of bias in the included trials; imprecision due to trial sequential analysis showing no crossing of trial sequential analysis monitoring boundaries, low number of participants and inconsistency due to large heterogeneity. The assessment time-points varied between trials with an interval of 1 day after randomization to 28 days after randomization.<sup>36,38</sup>

Subgroup analysis comparing different fever therapies showed evidence of a subgroup difference ( $p\leq 0.01$ ) (Figure S23). When trials assessing ibuprofen were analysed separately, meta-analysis showed RR 0.76; 95% CI 0.64 to 0.91;  $I^2=0\%$ , 2 trials (Figure S23). When trials assessing acetaminophen were analysed separately, Fisher's exact test showed RR 4.76; 95% CI 0.24 to 96.16; 1 trial (Figure S23). When trials assessing sulindac were analysed separately, Fisher's exact test showed RR 2.18; 95% CI 1.28 to 3.70; 1 trial (Figure S23).

Subgroup analysis comparing different fever origins showed evidence of a subgroup difference ( $p\leq 0.01$ ) (Figure S25). When trials assessing infectious fever were analysed separately, meta-analysis showed RR 2.23; 95% CI 1.32 to 3.75;  $I^2=0\%$ , 2 trials (Figure S25). When trials assessing non-infectious fever were analysed separately, Fisher's exact test showed RR 0.81; 95% CI 0.55 to 1.18; 1 trial (Figure S25). When trials assessing fever of unknown origin were analysed separately, Fisher's exact test showed RR 0.75; 95% CI 0.62 to 0.91; 1 trial (Figure S25).

Subgroup analysis comparing different follow-up times showed evidence of a subgroup difference ( $p\leq 0.01$ ) (Figure S24). When trials with 1-day follow-up were analysed separately,



Fisher's exact test showed RR 4.76; 95% CI 0.24 to 96.16; 1 trial (Figure S26). When trials with 7-days follow-up were analysed separately, Fisher's exact test showed RR 2.18; 95% CI 1.28 to 3.70; 1 trial (Figure S26). When trials with 28-days follow-up were analysed separately, Fisher's exact test showed RR 0.75; 95% CI 0.61 to 0.91; 1 trial (Figure S26). When trials with in-hospital follow-up were analysed separately, Fisher's exact test showed RR 0.81; 95% CI 0.55 to 1.18; 1 trial (Figure S26).

None of the other subgroup analyses showed evidence of a difference (Figure S24, S27).

### **Exploratory outcomes**

There was only one trial (two comparisons) presenting data on time until resolution of fever. The trial authors concluded that there was no significant difference in the time until resolution of fever in the three compared groups.<sup>40</sup>

Due to temperature change (fever reduction) data being presented in multiple ways not analysable in a meta-analysis, the available data are presented descriptively. The mean ( $\pm$ SD) maximal reported temperature reduction caused by antipyretics was 1.28°C ( $\pm$ 0.45) and the mean ( $\pm$ SD) maximal reported temperature reduction caused by physical cooling was 1.07 °C ( $\pm$ 0.62). Forty-six out of seventy-five comparisons showed a significantly lower temperature in the fever therapy group compared with the group without fever therapy (Table S1). The twenty-nine comparisons not presenting a significantly lower temperature in the fever therapy group consisted of 551 participants accounting for 10.7% of all participants.

# Figures

Figure S1: PRISMA Flow Diagram

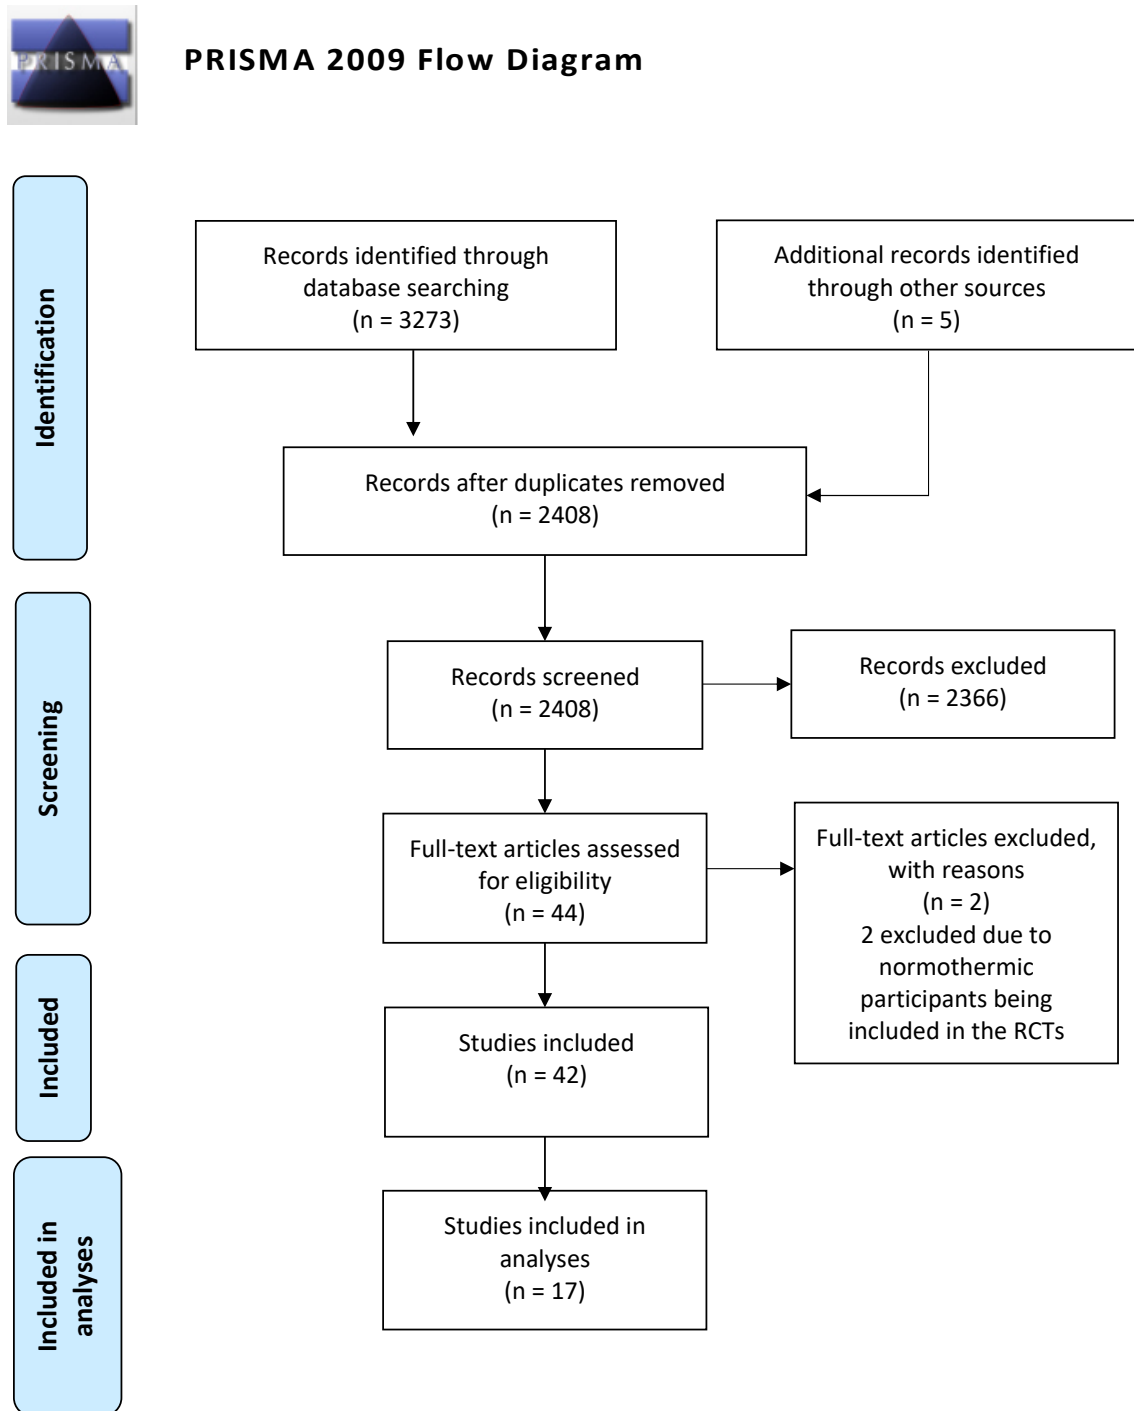

From: Moher D, Liberati A, Tetzlaff J, Altman DG, The PRISMA Group (2009). Preferred Reporting Items for Systematic Reviews and Meta-Analyses: The PRISMA Statement. PLoS Med 6(7): e1000097. doi:10.1371/journal.pmed1000097

For more information, visit [www.prisma-statement.org](http://www.prisma-statement.org).

**Figure S2: Fixed-effects meta-analysis of fever therapy versus control interventions on all-cause mortality**

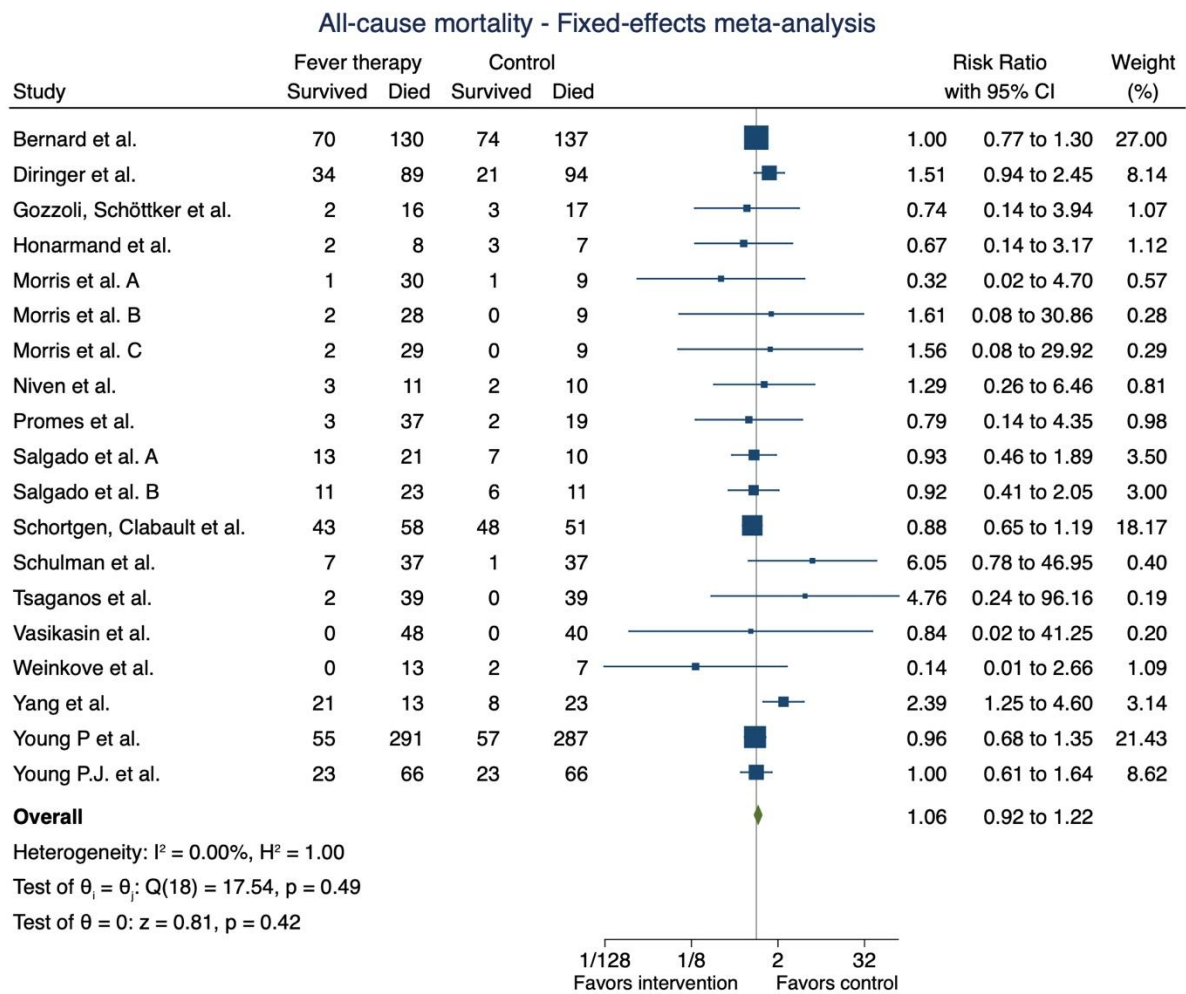

Fixed-effects Mantel-Haenszel model

Fixed-effects meta-analysis showed no evidence of a difference between fever therapy and control interventions on all-cause mortality (RR 1.06; 95% CI 0.92 to 1.22;  $p = 0.42$ ;  $I^2 = 0\%$ ; 16 trials).

RR: Risk ratio

CI: Confidence interval

$I^2$ : Measure of heterogeneity

**Figure S3: Subgroup analysis of all-cause mortality comparing different intervention types**

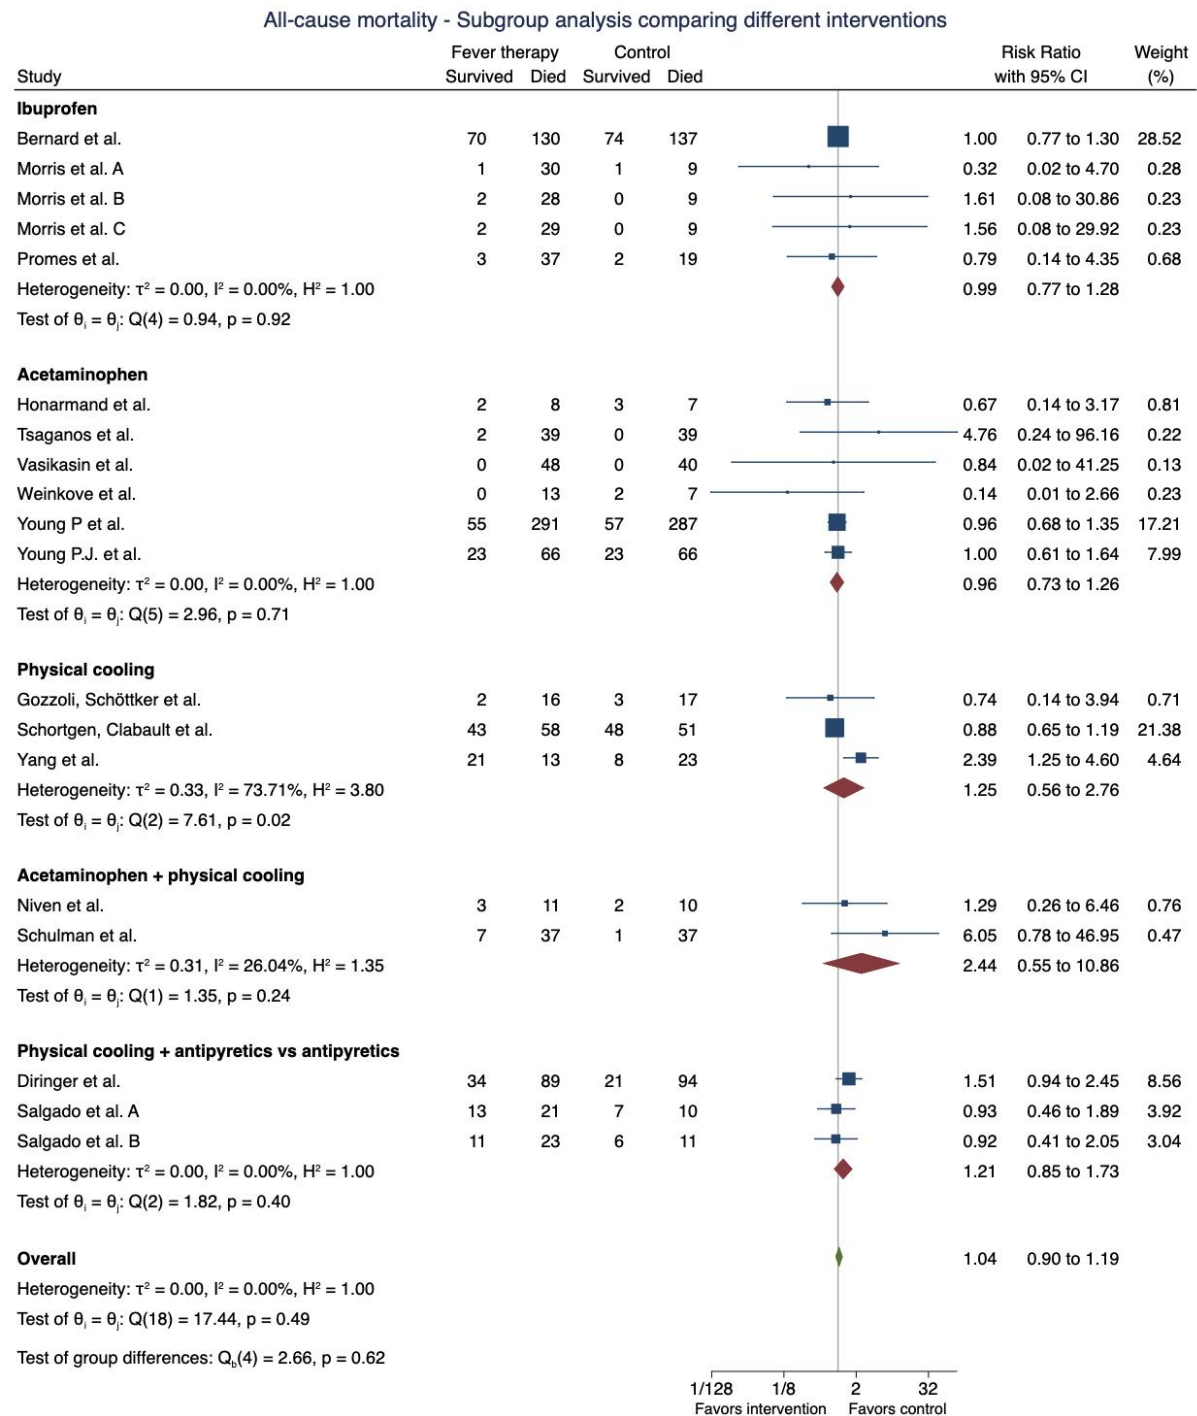

Subgroup analysis comparing different intervention types showed no evidence of a subgroup difference ( $p = 0.62$ ).

RR: Risk ratio

CI: Confidence interval

$I^2$ : Measure of heterogeneity

**Figure S4: Subgroup analysis of all-cause mortality comparing critically ill versus non-critically ill**

All-cause mortality - Subgroup analysis comparing critically ill participants with non-critically ill participants

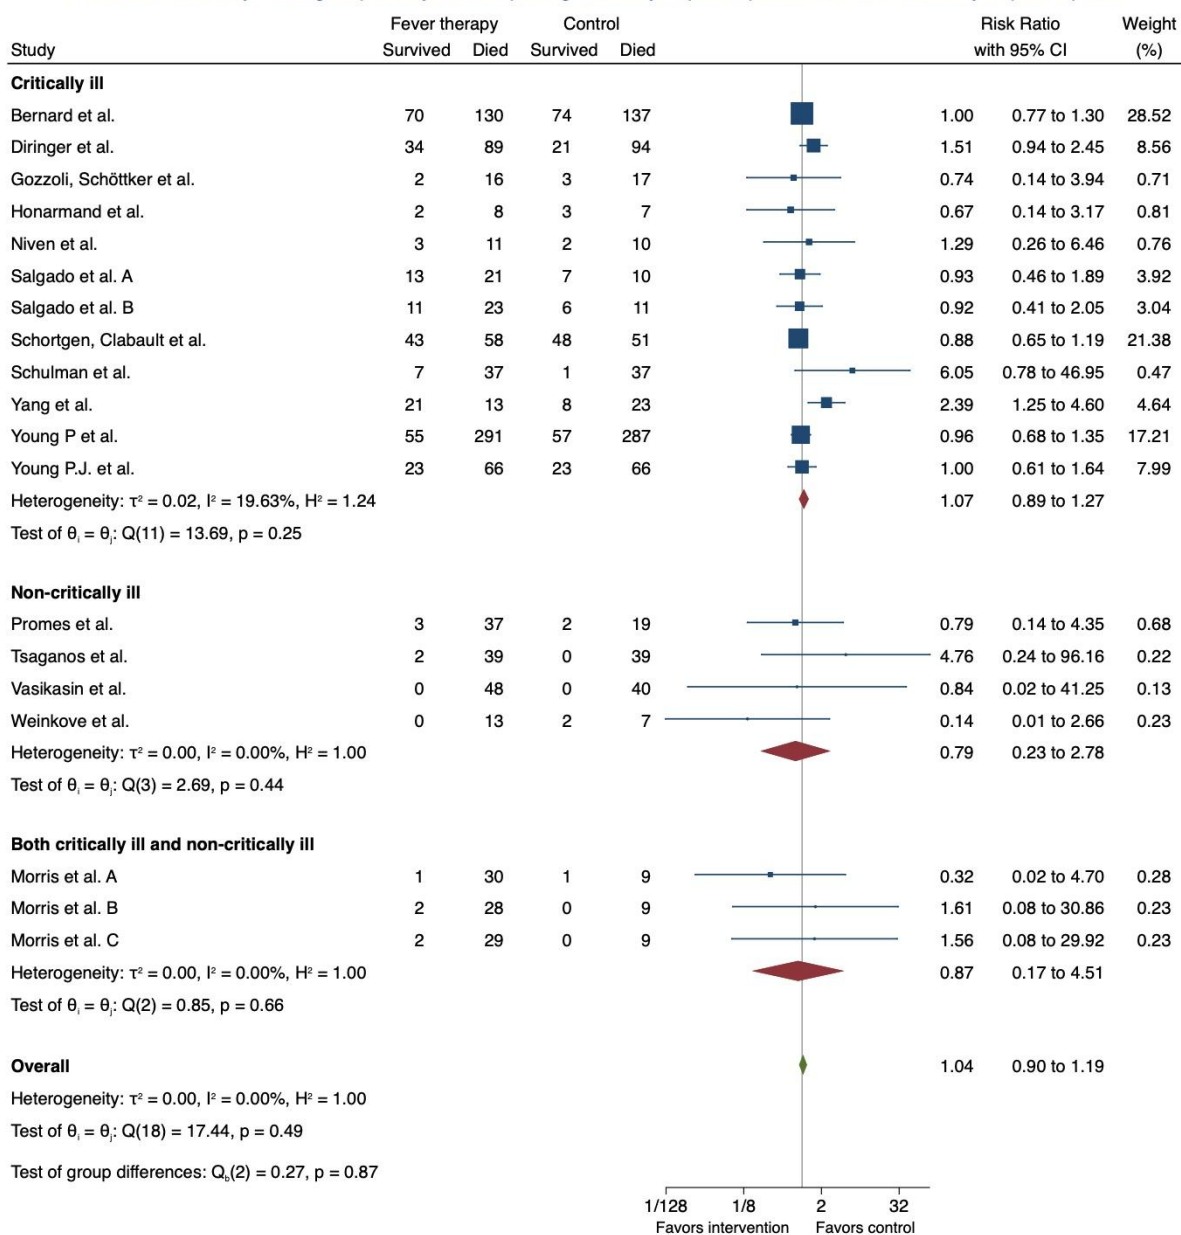

Random-effects DerSimonian-Laird model

Subgroup analysis comparing critically ill participants with non-critically ill participants showed no evidence of a subgroup difference ( $p = 0.87$ ).

RR: Risk ratio

CI: Confidence interval

$I^2$ : Measure of heterogeneity

**Figure S5: Subgroup analysis of all-cause mortality comparing infectious fever with non-infectious fever**

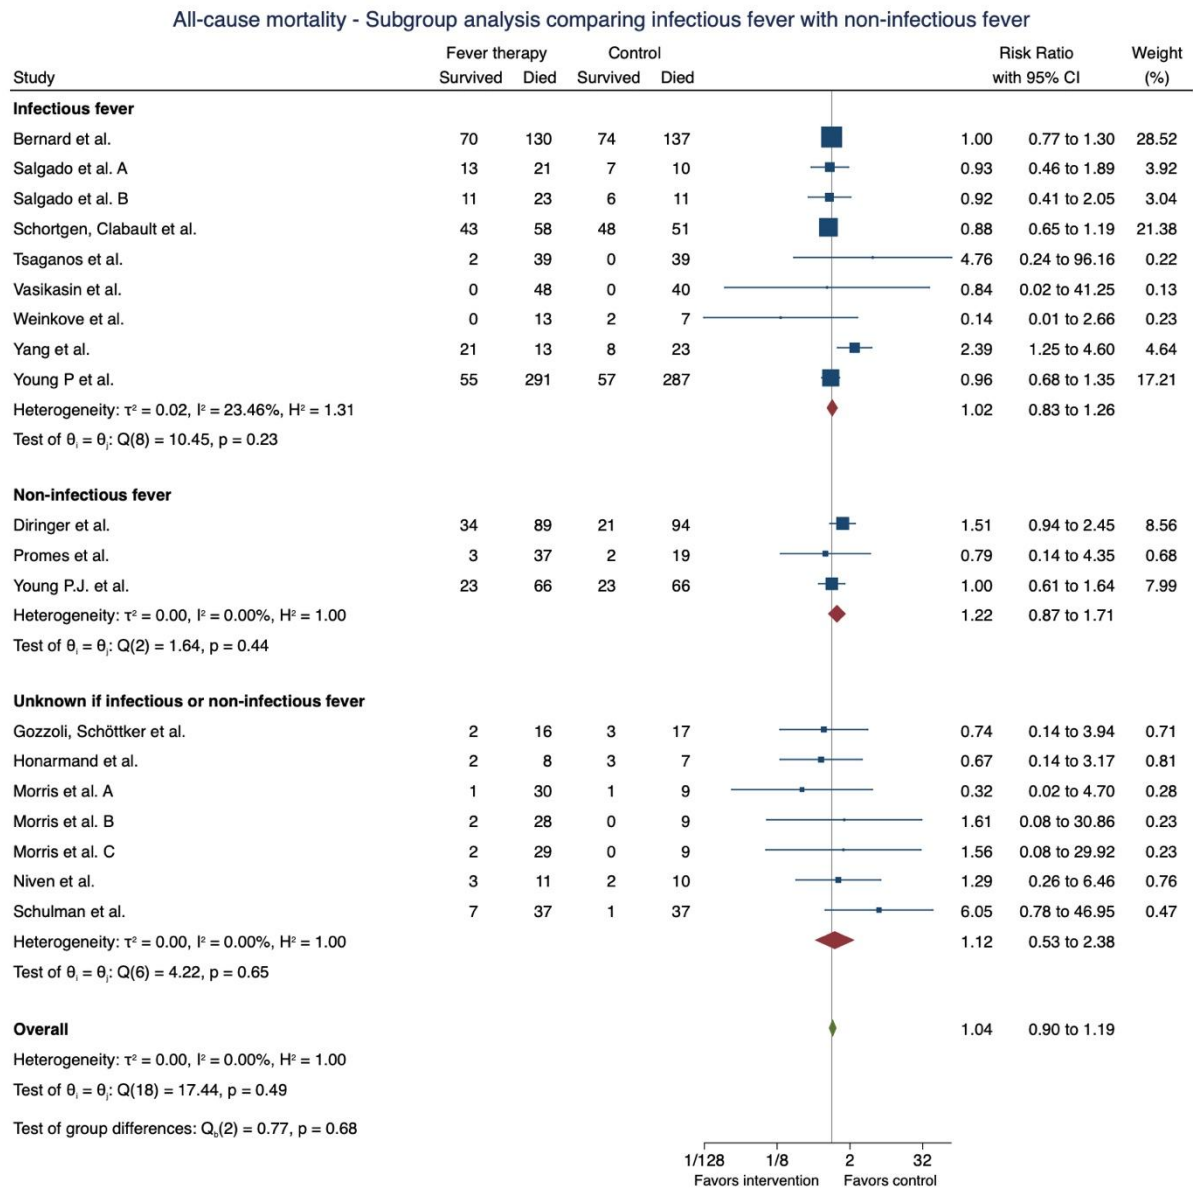

Random-effects DerSimonian-Laird model

Subgroup analysis comparing infectious fever with non-infectious fever showed no evidence of a subgroup difference ( $p = 0.68$ ).

RR: Risk ratio

CI: Confidence interval

$I^2$ : Measure of heterogeneity

**Figure S6: Subgroup analysis of all-cause mortality comparing different control interventions**

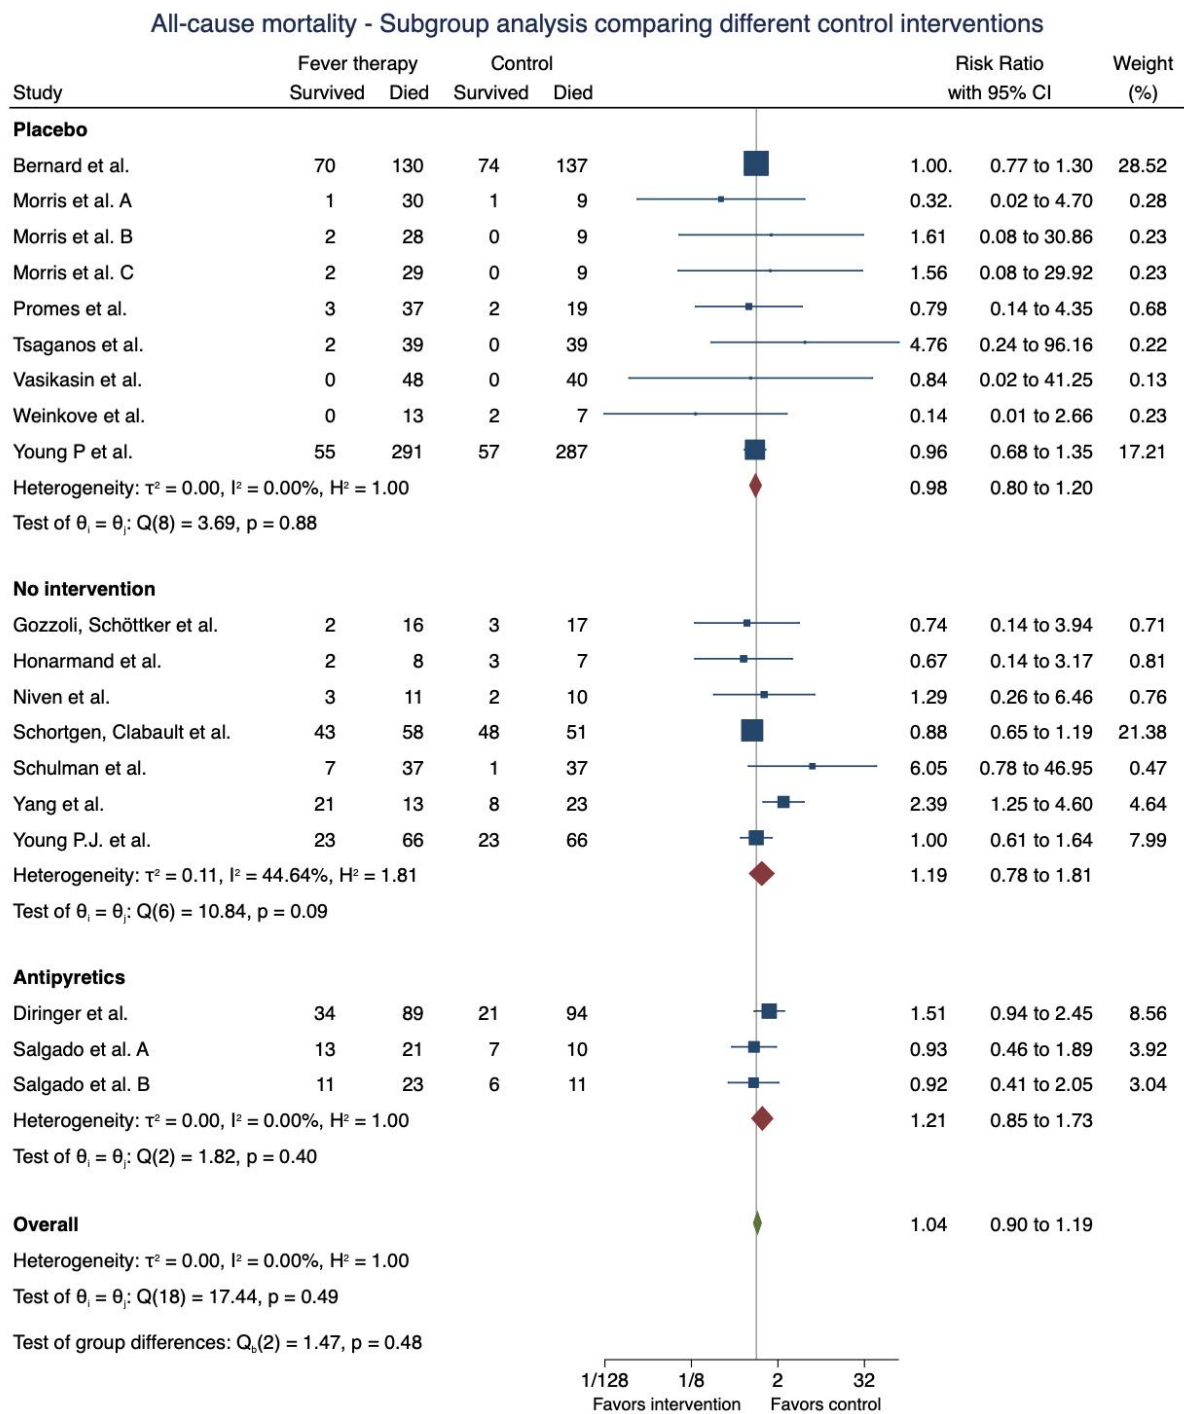

Random-effects DerSimonian-Laird model

Subgroup analysis comparing different control interventions (placebo, standard care and antipyretics) showed no evidence of a subgroup difference ( $p = 0.48$ ).

RR: Risk ratio

CI: Confidence interval

$I^2$ : Measure of heterogeneity



### Figure S7: Subgroup analysis of all-cause mortality comparing trials with significantly lower temperature in fever the fever therapy group with trials with non-significantly lower temperature in the fever therapy group

All-cause mortality - Subgroup analysis comparing trials with significantly lower temperature in fever therapy group with trials which did not have a significantly lower temperature in the fever therapy group

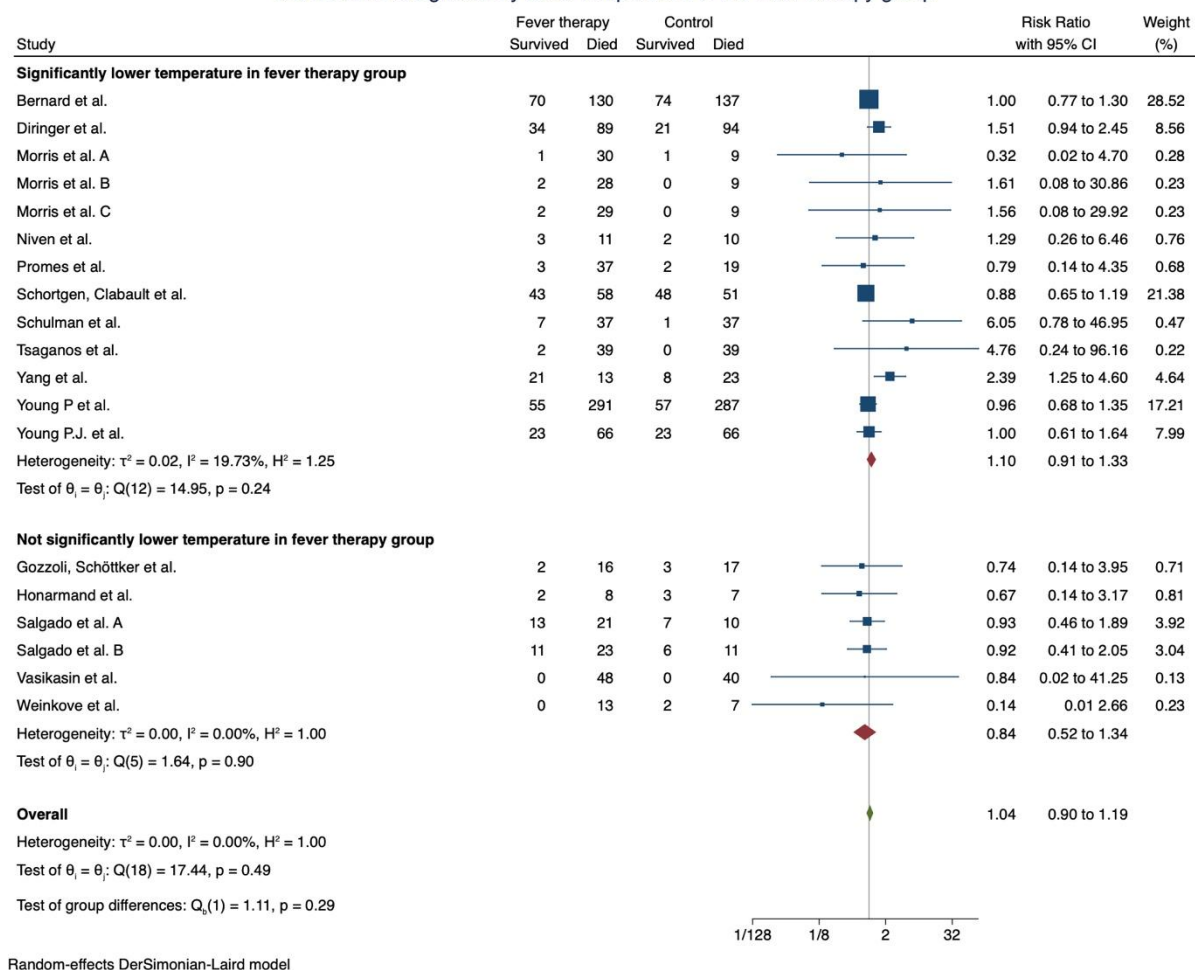

Random-effects DerSimonian-Laird model

Subgroup analysis comparing trials with significantly lower temperature in fever the fever therapy group with trials with non-significantly lower temperature in the fever therapy group showed no evidence of a subgroup difference ( $p = 0.29$ ).

RR: Risk ratio

CI: Confidence interval

$I^2$ : Measure of heterogeneity



**Figure S8: Subgroup analysis of all-cause mortality comparing different follow-up times**

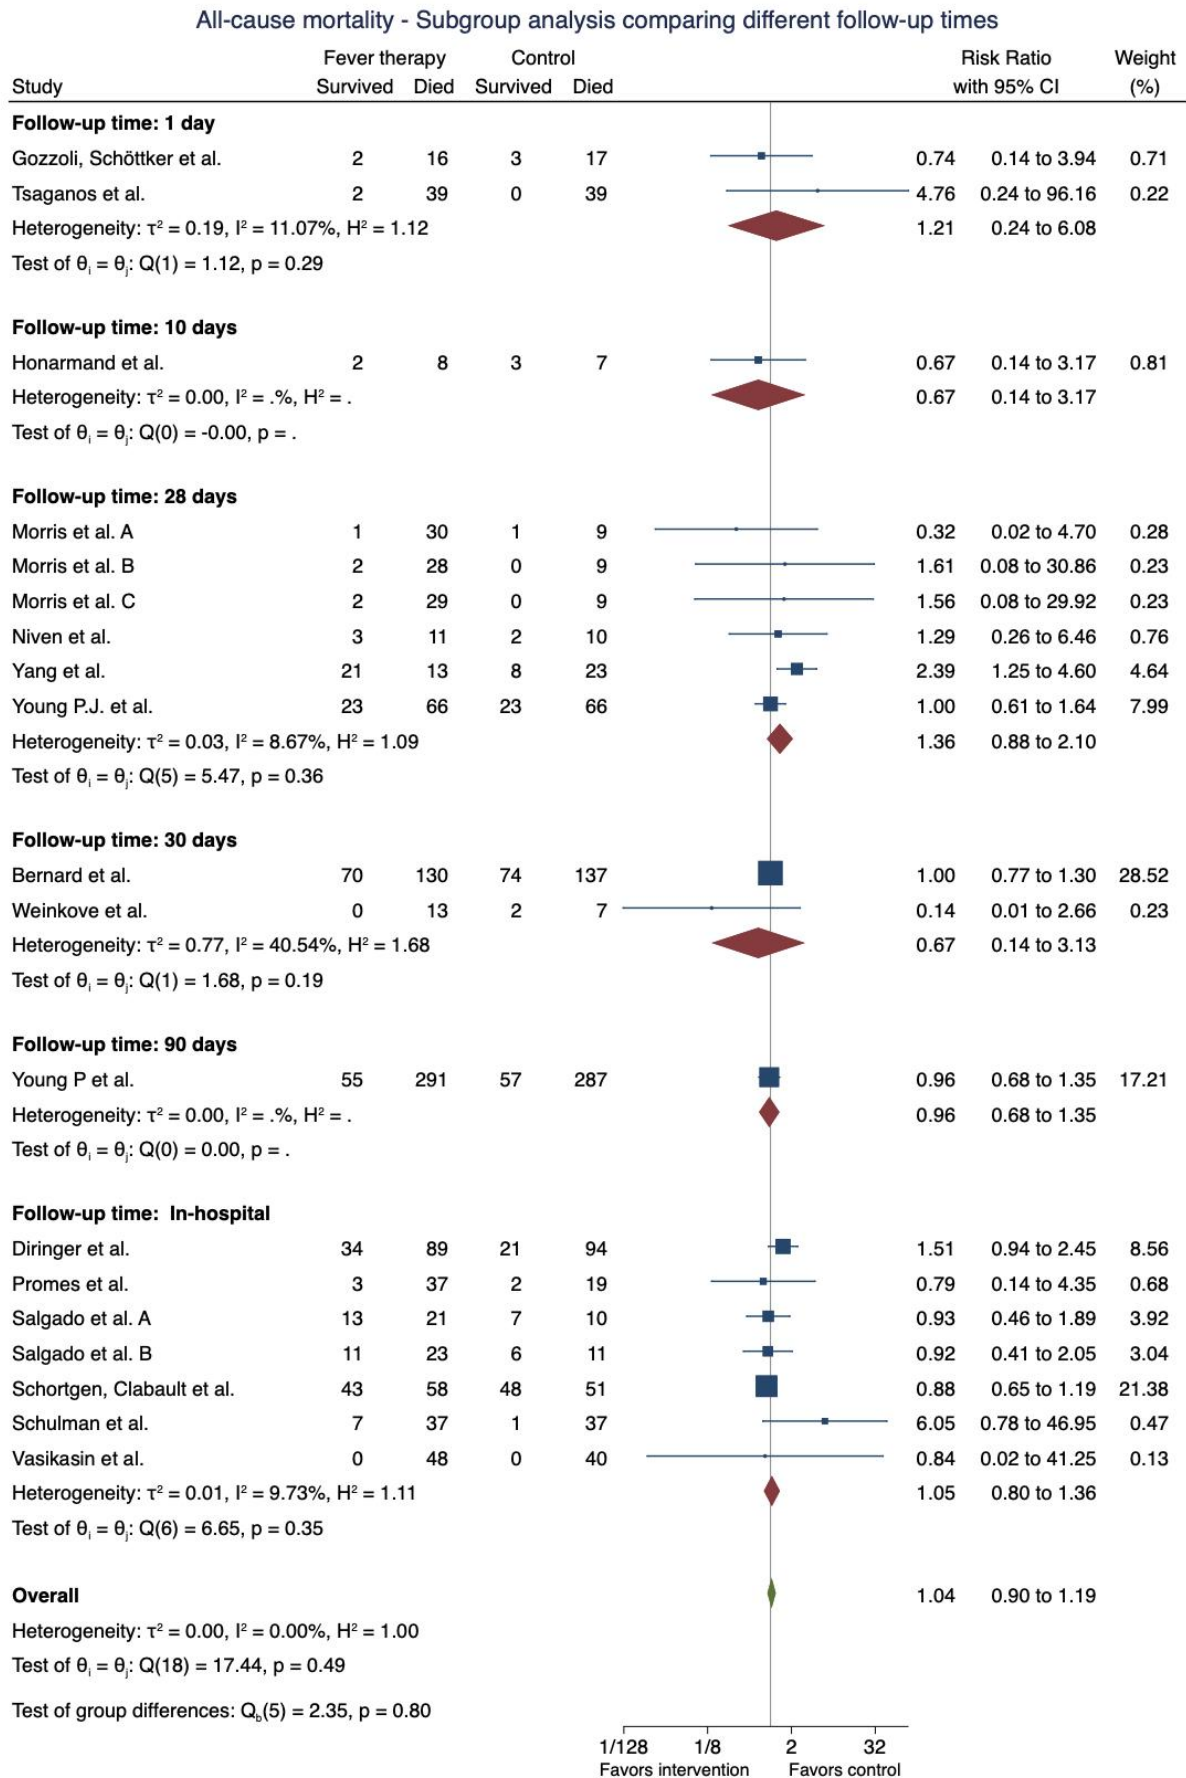

Random-effects DerSimonian-Laird model

Subgroup analysis comparing different follow-up times showed no evidence of a subgroup difference ( $p = 0.80$ ).  
RR: Risk ratio  
CI: Confidence interval  
 $I^2$ : Measure of heterogeneity

**Figure S9: Subgroup analysis of all-cause mortality comparing trials with for profit bias with trials without for-profit bias**

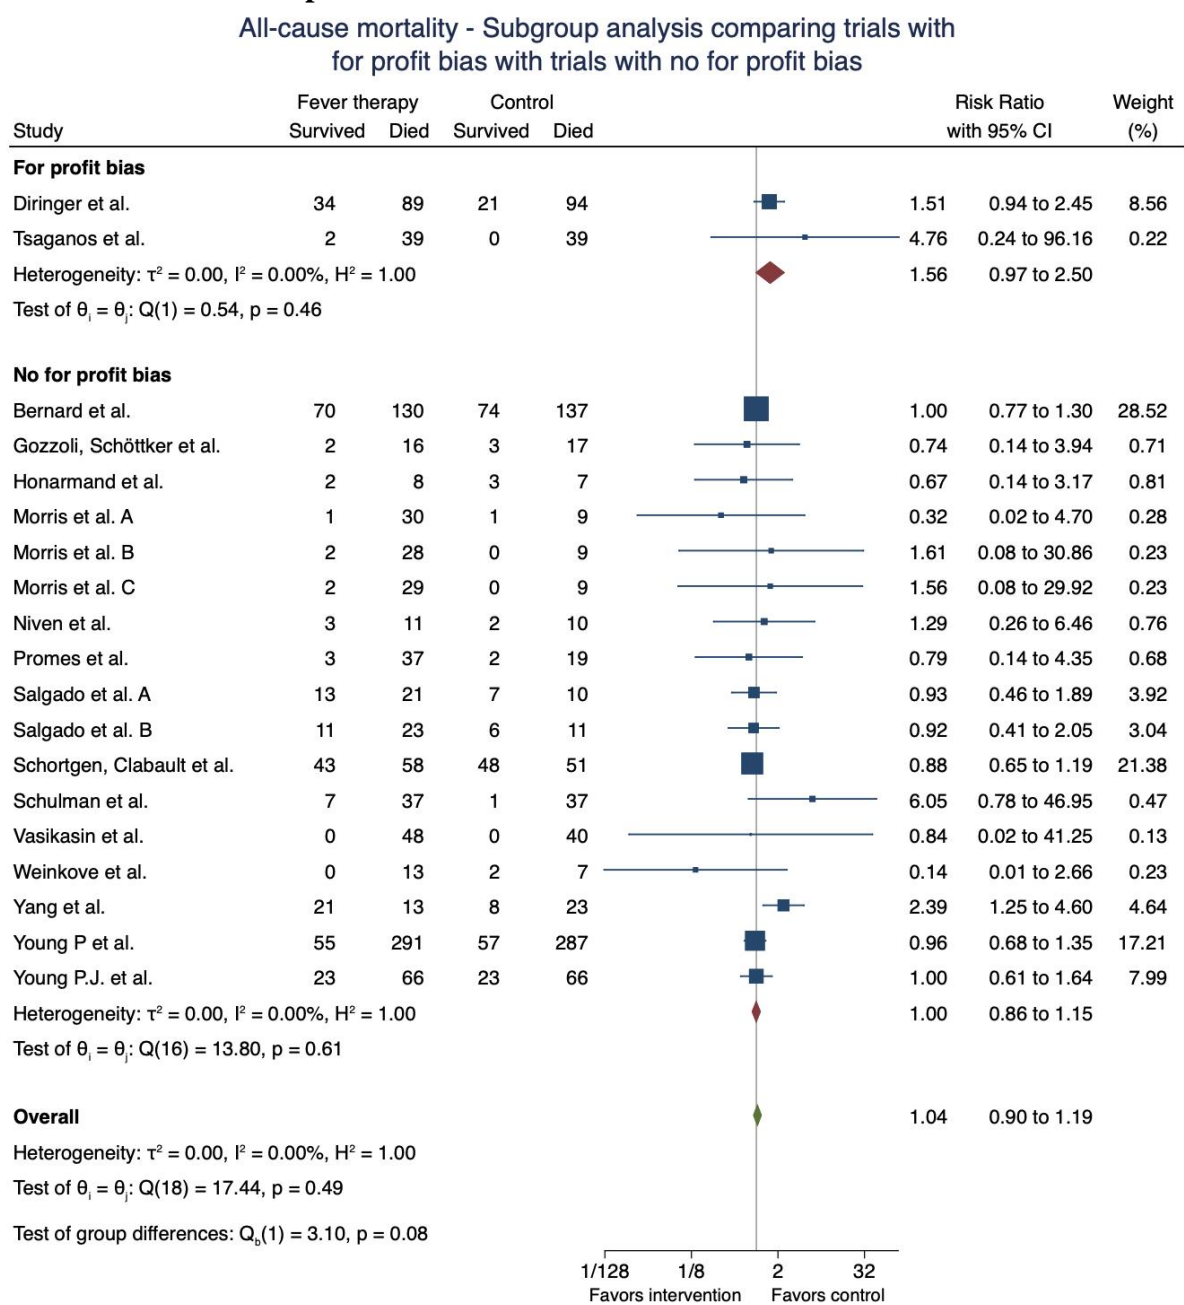

Random-effects DerSimonian-Laird model

Subgroup analysis comparing trials with for profit biased with trials with no for profit bias showed no evidence of a subgroup difference ( $p = 0.08$ ).

RR: Risk ratio

CI: Confidence interval

$I^2$ : Measure of heterogeneity

**Figure S10: Subgroup analysis of all-cause mortality comparing trials with different levels of risk of bias**

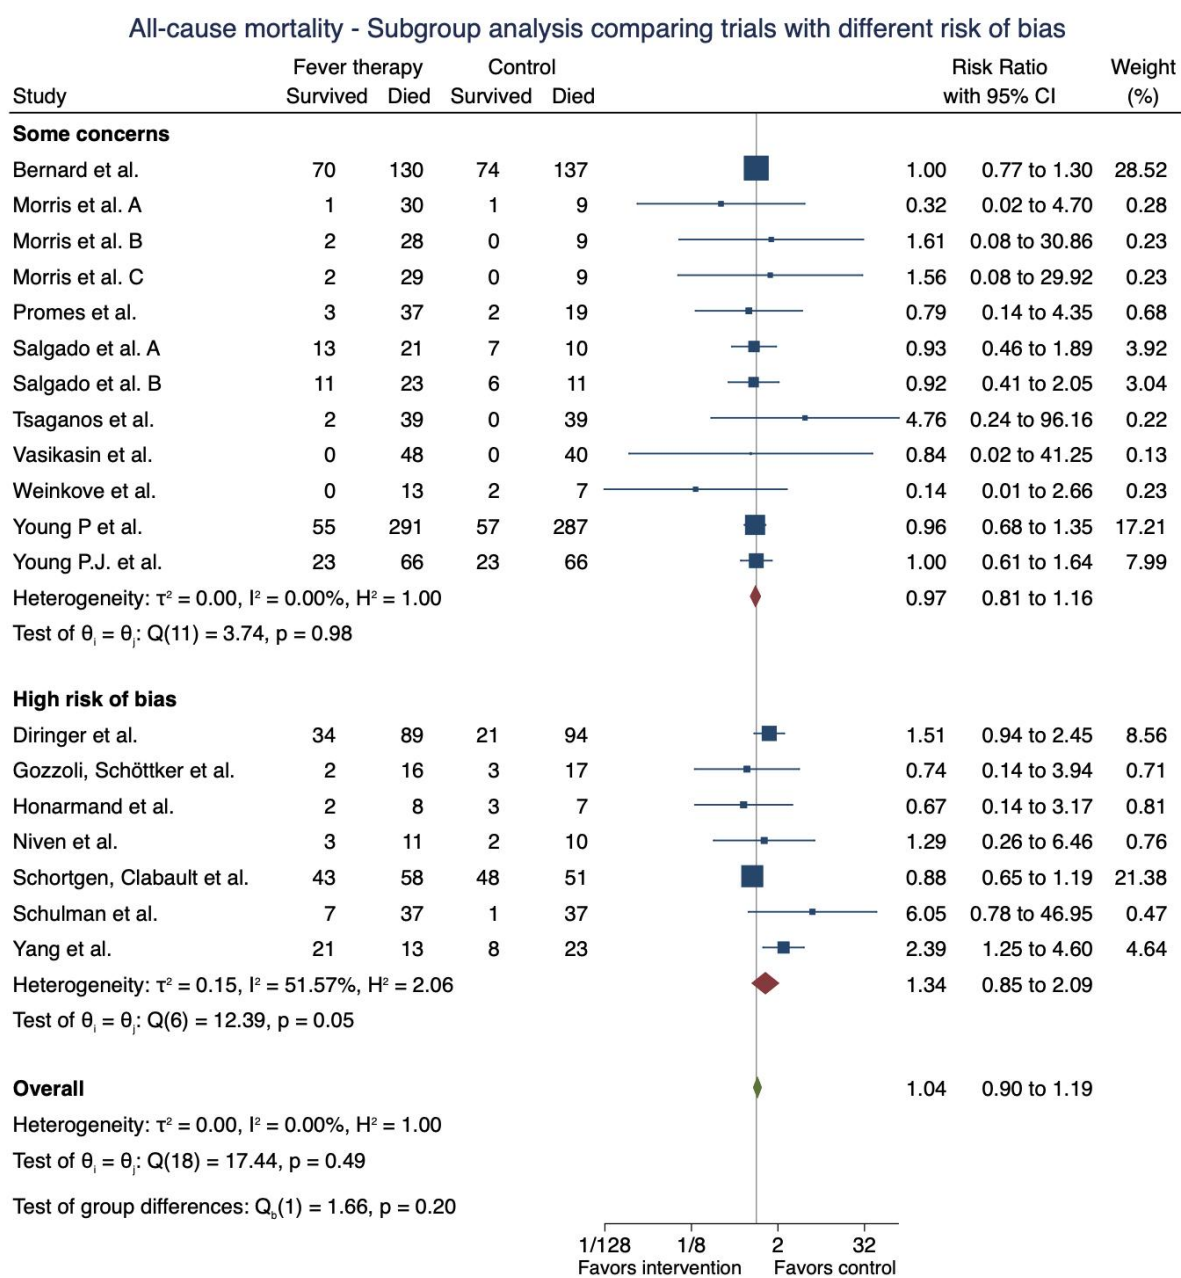

Random-effects DerSimonian-Laird model

Subgroup analysis comparing trials with different risk of bias showed no evidence of a subgroup difference ( $p = 0.20$ ).

RR: Risk ratio

CI: Confidence interval

$I^2$ : Measure of heterogeneity

**Figure S11: Fixed-effects meta-analysis of fever therapy versus control interventions on serious adverse events**

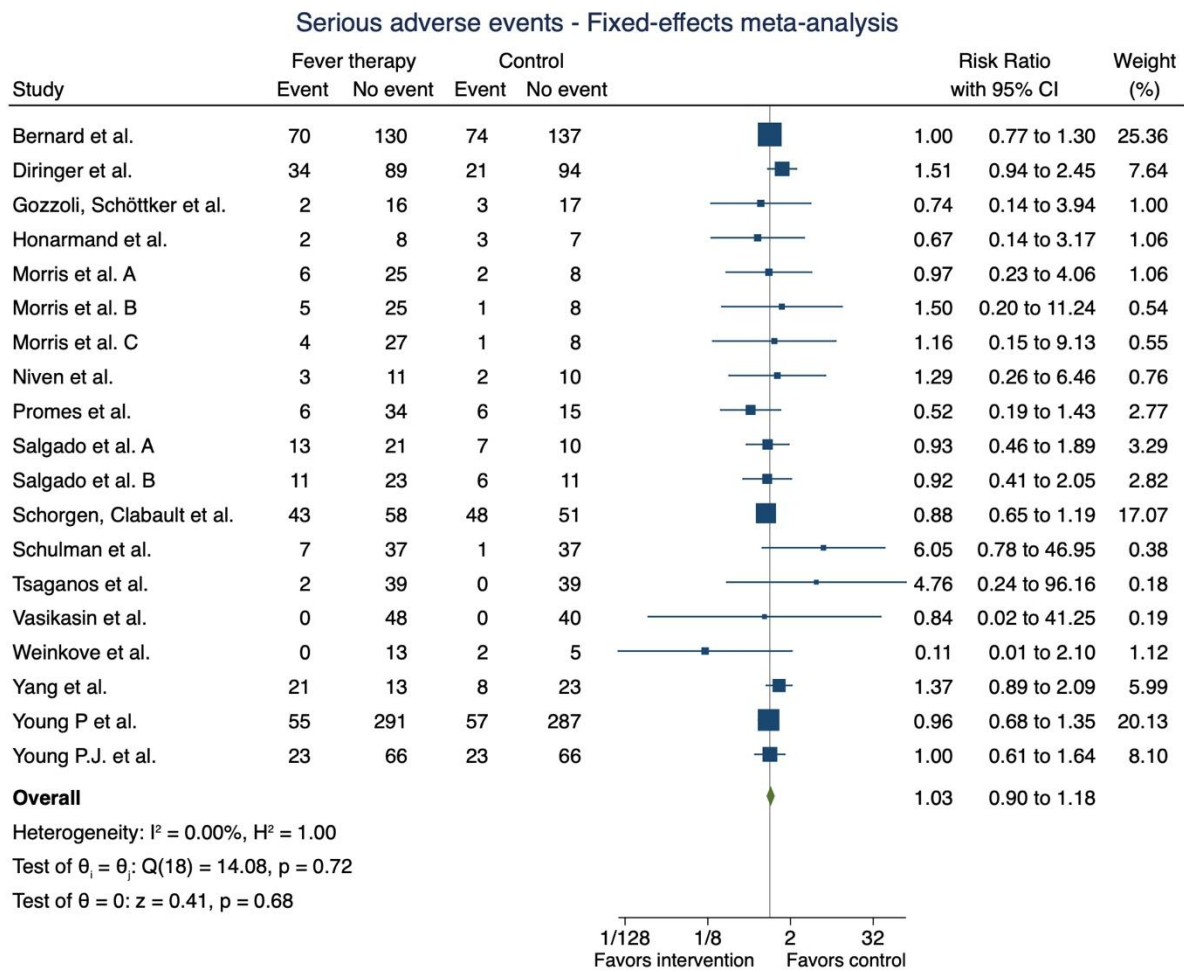

Fixed-effects Mantel-Haenszel model

Fixed-effects meta-analysis showed no evidence of a difference between fever control interventions and control interventions on serious adverse events (RR 1.03; 95% CI 0.90 to 1.18;  $p = 0.68$ ;  $I^2 = 0\%$ ; 16 trials).

RR: Risk ratio

CI: Confidence interval

$I^2$ : Measure of heterogeneity

**Figure S12: Subgroup analysis of serious adverse events comparing different intervention types**

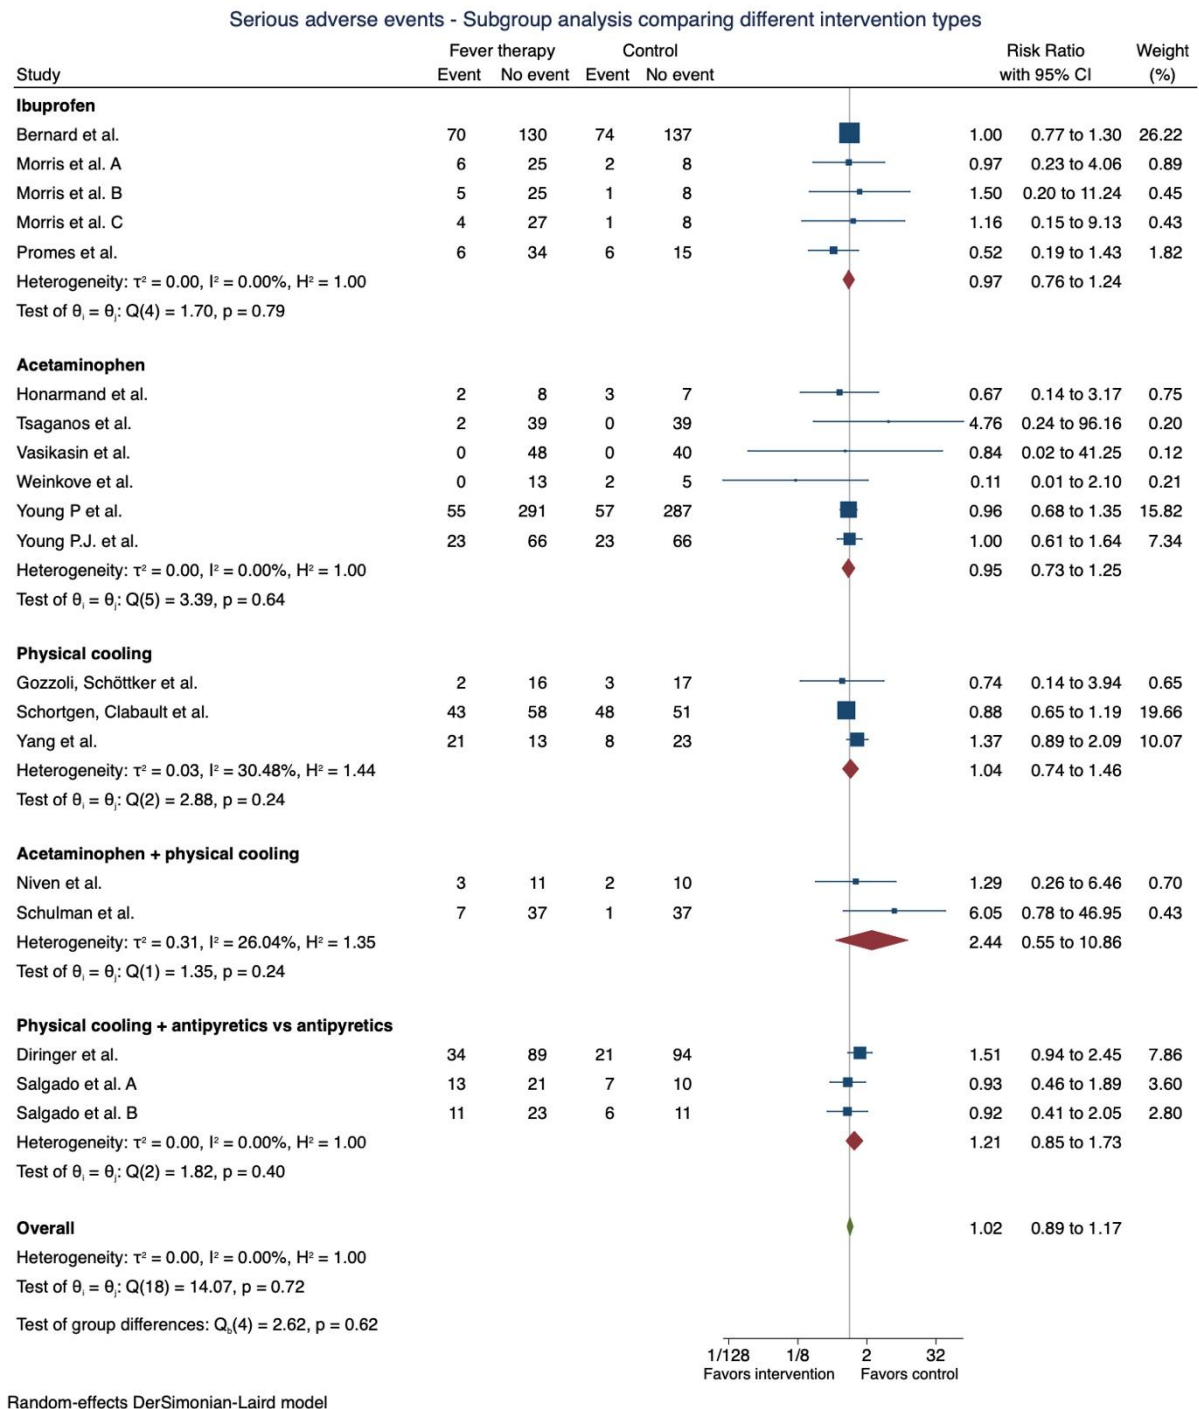

Subgroup analysis comparing different intervention types showed no evidence of a subgroup difference ( $p = 0.62$ ).

RR: Risk ratio

CI: Confidence interval

$I^2$ : Measure of heterogeneity



**Figure S13: Subgroup analysis of serious adverse events comparing critically ill versus non-critically ill**

Serious adverse events - Subgroup analysis comparing critically ill participants with non-critically ill participants

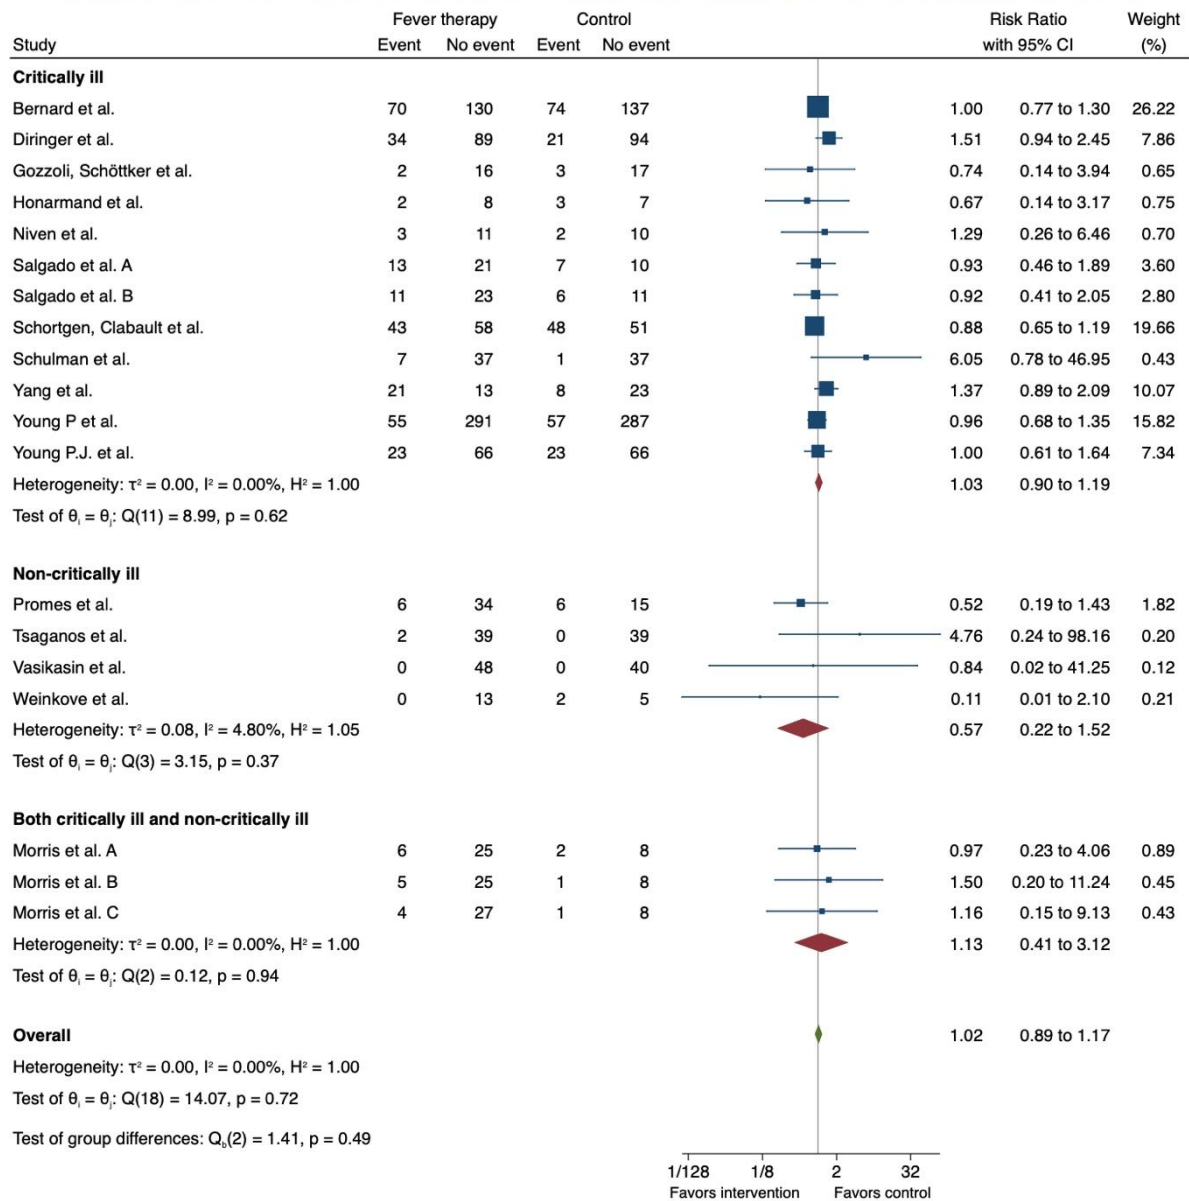

Random-effects DerSimonian-Laird model

Subgroup analysis comparing critically ill with non-critically ill showed no evidence of a subgroup difference ( $p = 0.49$ ).

RR: Risk ratio

CI: Confidence interval

$I^2$ : Measure of heterogeneity

**Figure S14: Subgroup analysis of serious adverse events comparing infectious fever with non-infectious fever**

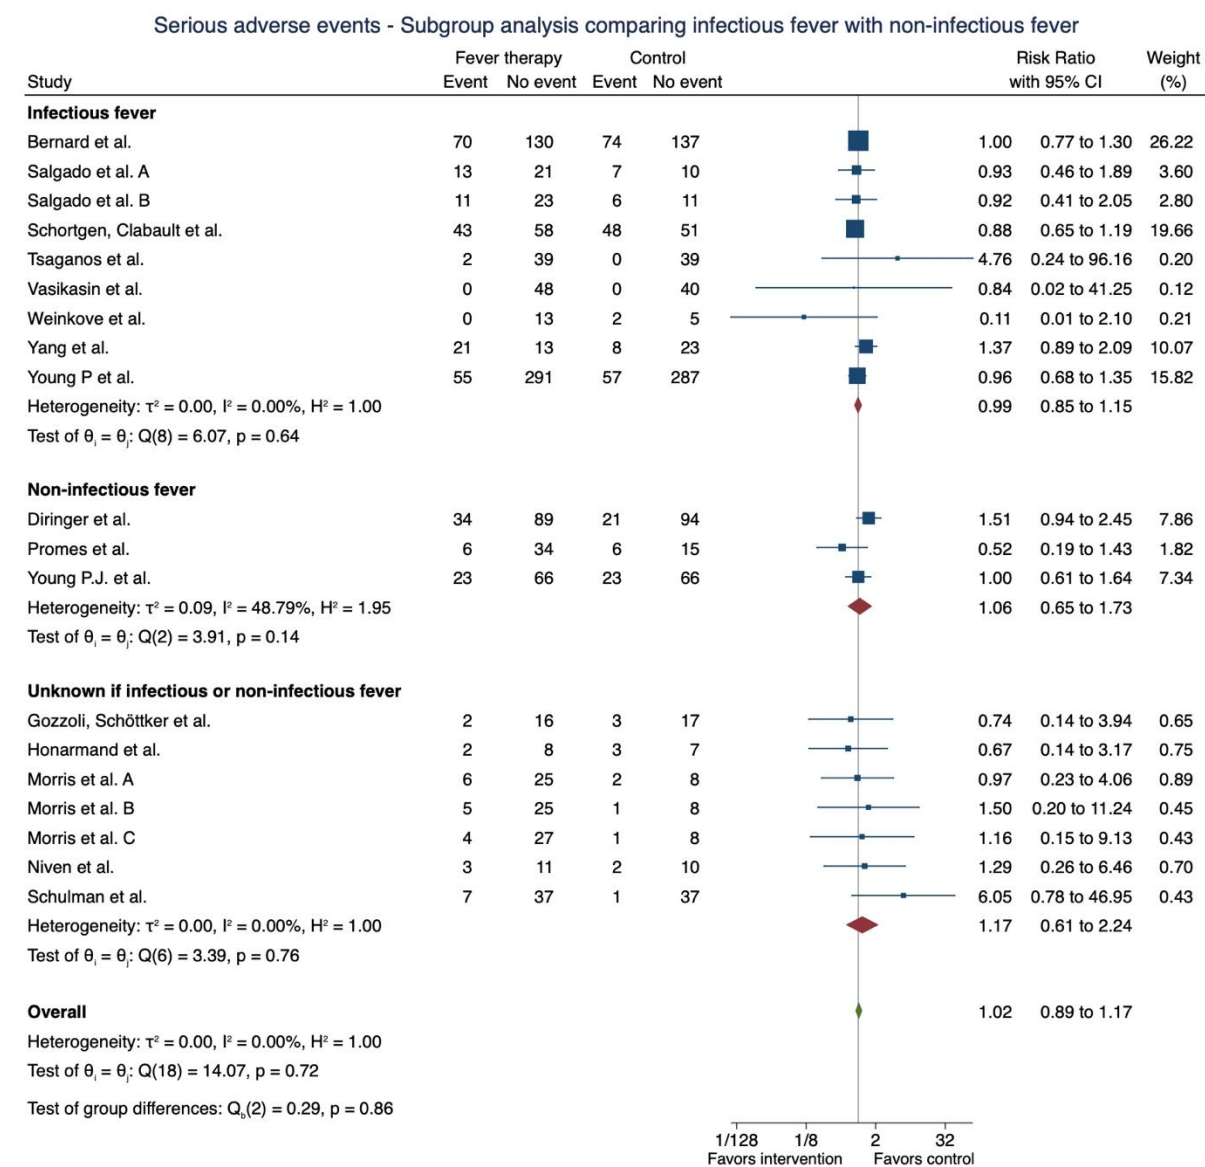

Random-effects DerSimonian-Laird model

Subgroup analysis comparing infectious fever with non-infectious fever showed no evidence of a subgroup difference ( $p = 0.86$ ).

RR: Risk ratio

CI: Confidence interval

$I^2$ : Measure of heterogeneity



**Figure S15: Subgroup analysis of serious adverse events comparing different control interventions**

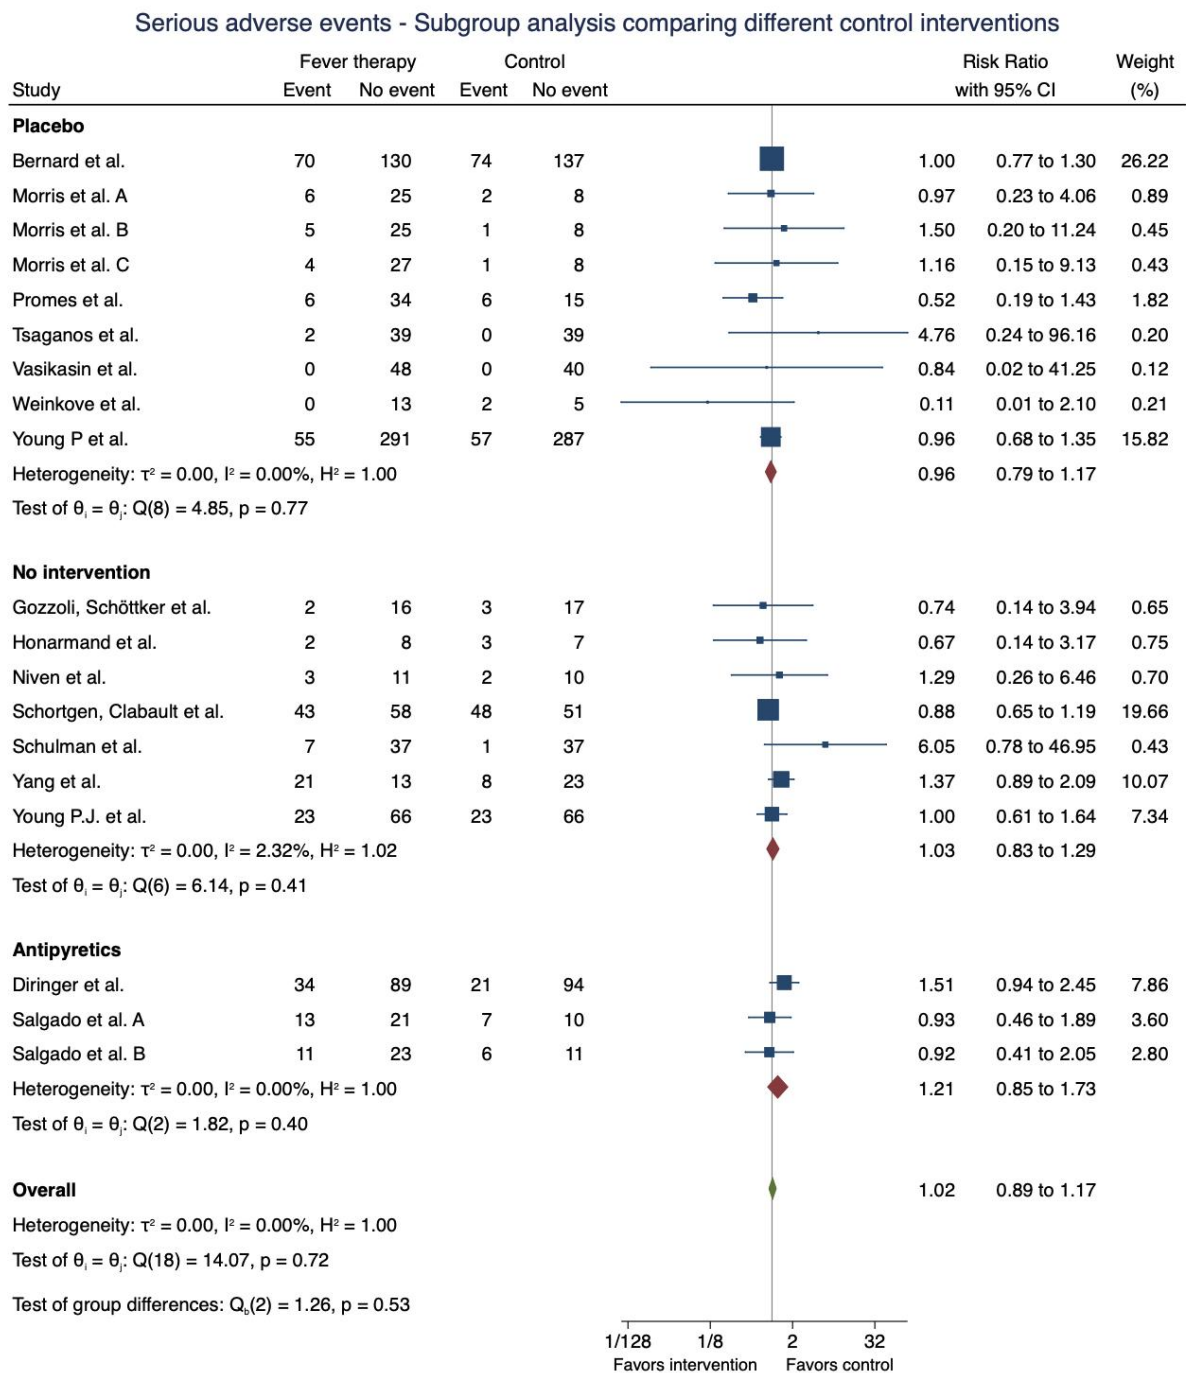

Random-effects DerSimonian-Laird model

Subgroup analysis comparing different interventions showed no evidence of a subgroup difference ( $p = 0.53$ ).

RR: Risk ratio

CI: Confidence interval

$I^2$ : Measure of heterogeneity

### Figure S16: Subgroup analysis of serious adverse events comparing trials with significantly lower temperature in fever the fever therapy group with trials with non-significantly lower temperature in the fever therapy group

Serious adverse events - Subgroup analysis comparing trials with significantly lower temperature in fever therapy group with trials which did not have significantly lower temperature in the fever therapy group

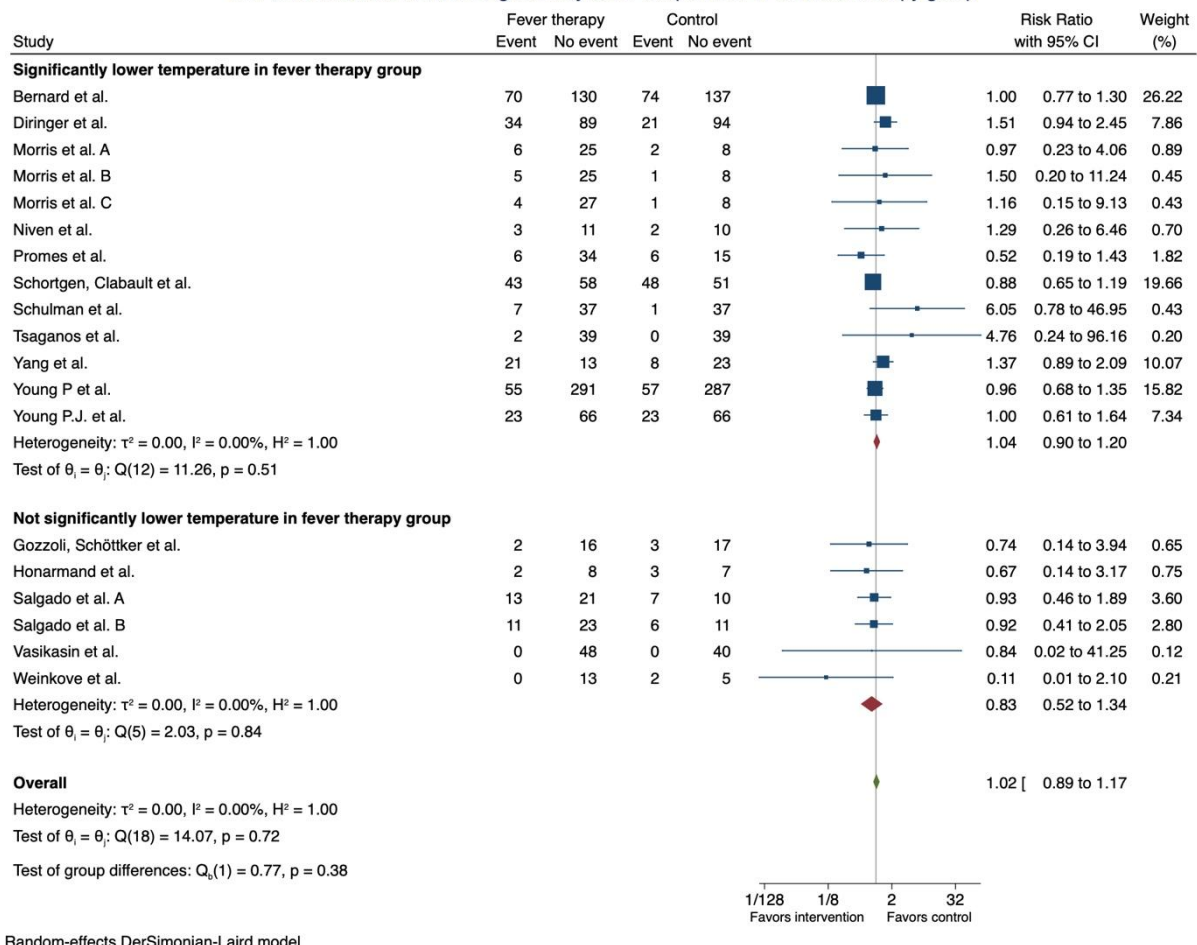

Subgroup analysis comparing trials with significantly lower temperature in fever the fever therapy group with trials with non-significantly lower temperature in the fever therapy group showed no evidence of a subgroup difference ( $p = 0.38$ ).

RR: Risk ratio

CI: Confidence interval

$I^2$ : Measure of heterogeneity

**Figure S17: Subgroup analysis of serious adverse events comparing different follow-up times**

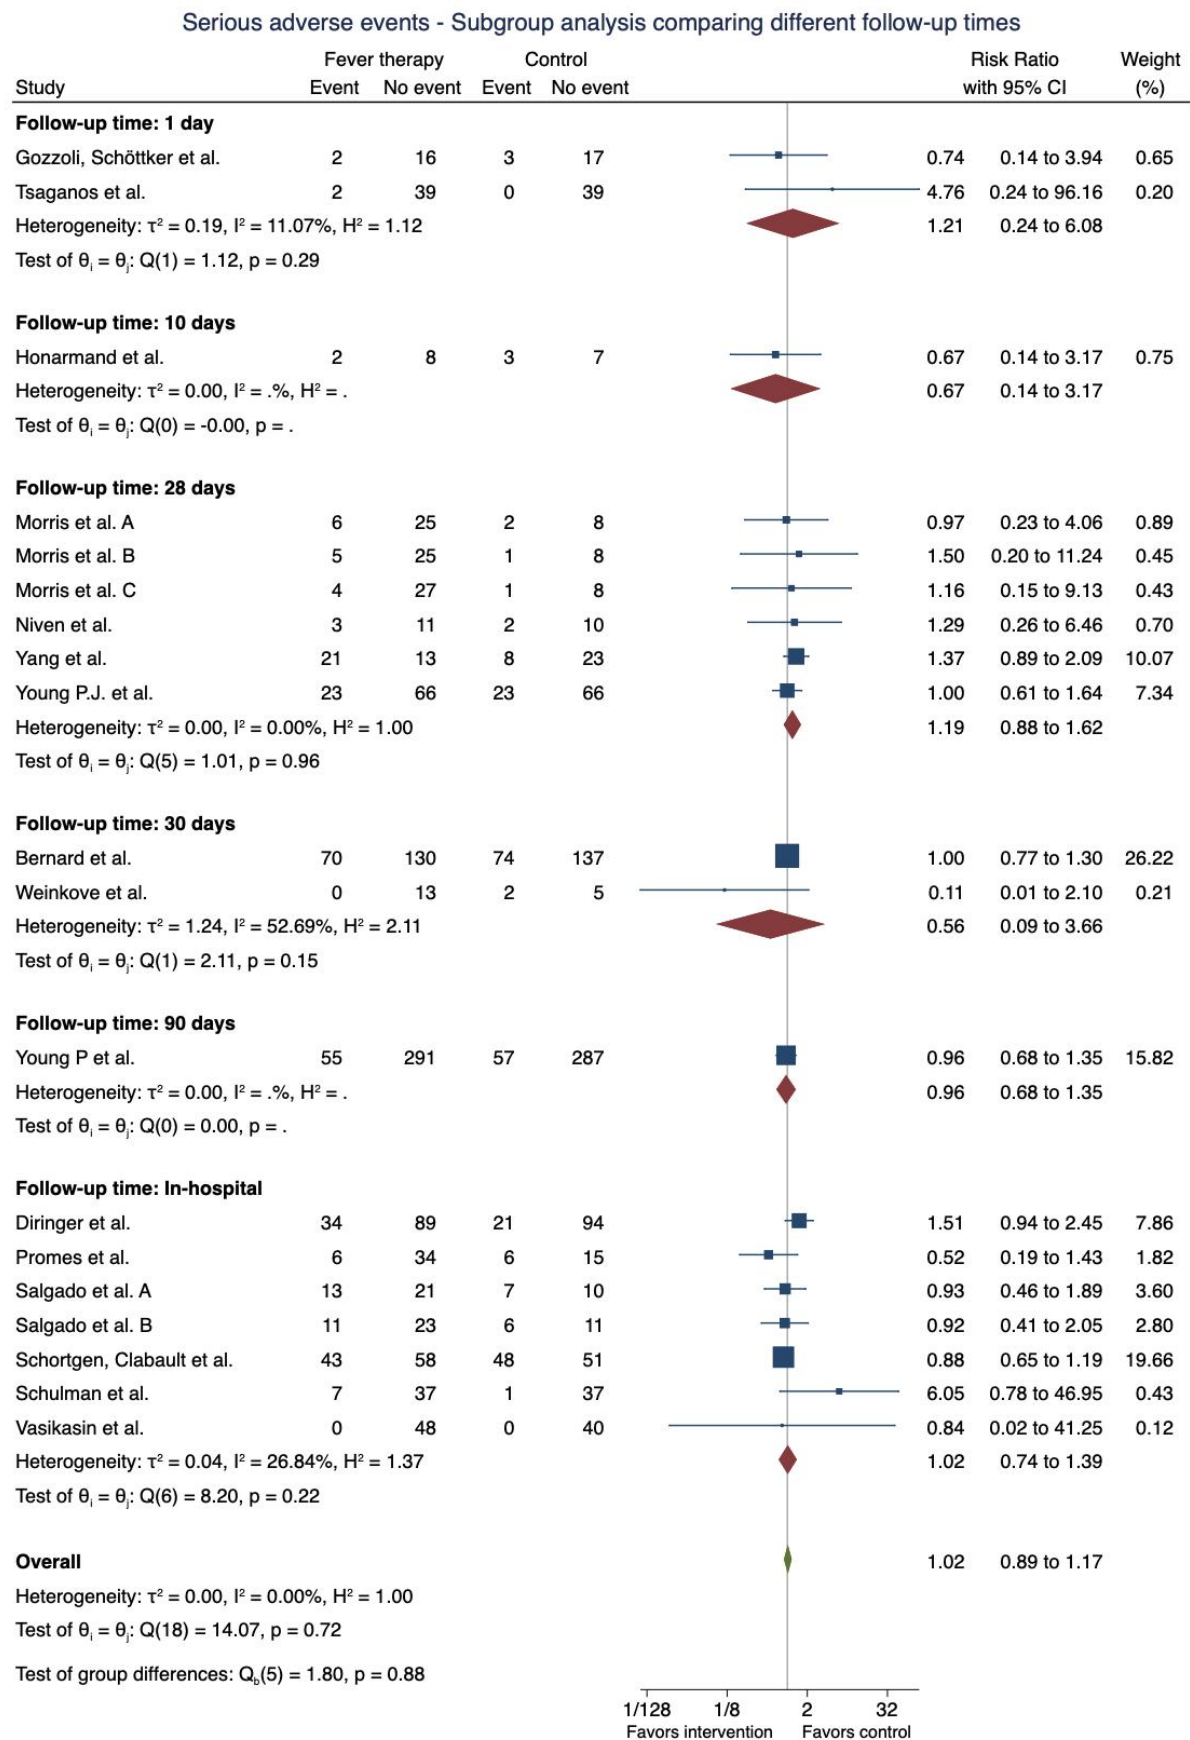

Random-effects DerSimonian-Laird model

Subgroup analysis comparing different follow-up times showed no evidence of a subgroup difference ( $p = 0.88$ ).  
RR: Risk ratio  
CI: Confidence interval  
 $I^2$ : Measure of heterogeneity

**Figure S18: Subgroup analysis of serious adverse events comparing trials with for profit bias with trials without for-profit bias**

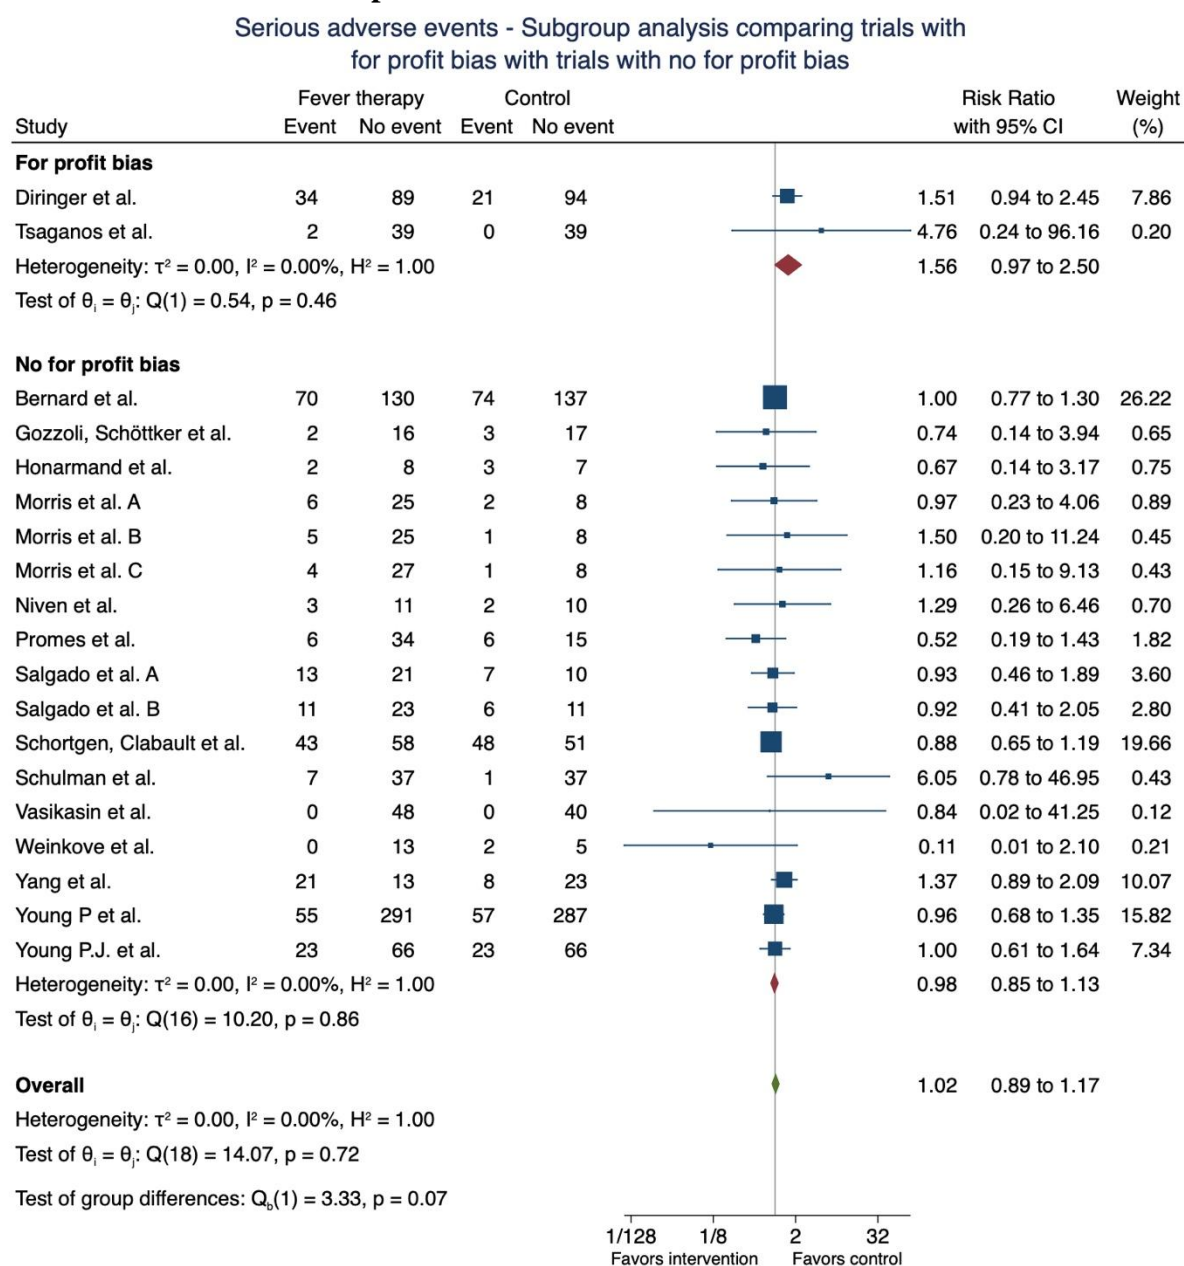

Random-effects DerSimonian-Laird model

Subgroup analysis comparing trials with for profit bias with trials without for profit showed no evidence of a subgroup difference ( $p = 0.07$ ).

RR: Risk ratio

CI: Confidence interval

$I^2$ : Measure of heterogeneity

**Figure S19: Subgroup analysis of serious adverse events comparing trials with different levels of risk of bias**

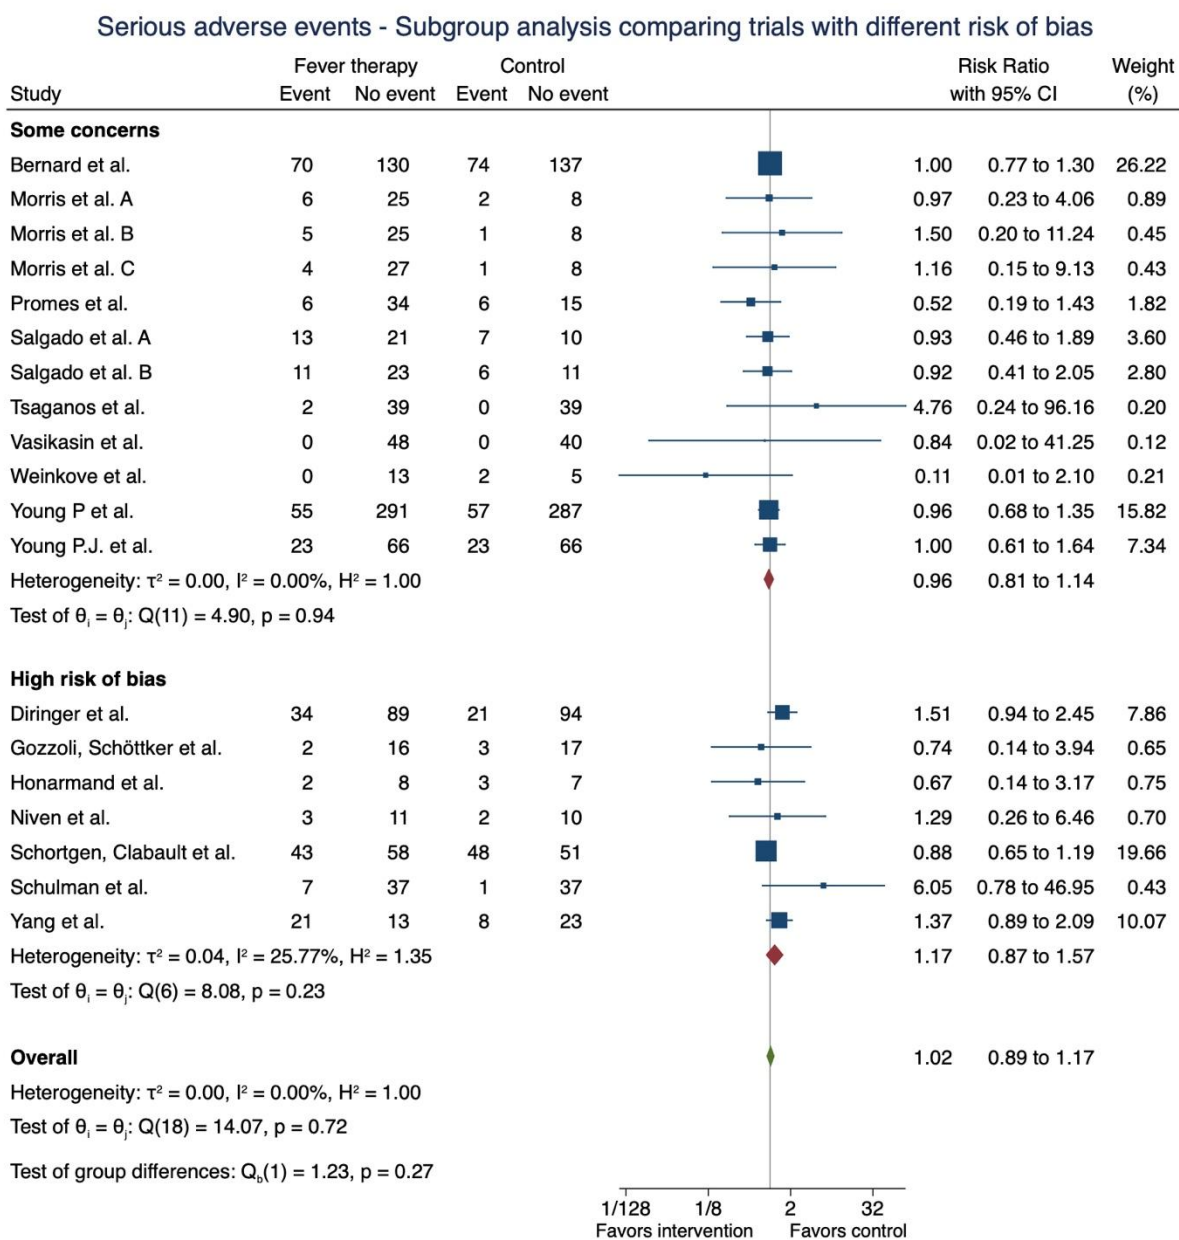

Random-effects DerSimonian-Laird model

Subgroup analysis comparing trials with different risk of bias showed no evidence of a subgroup difference ( $p = 0.27$ ).

RR: Risk ratio

CI: Confidence interval

$I^2$ : Measure of heterogeneity



**Figure S20: Random-effects meta-analysis of fever therapy versus control interventions on non-serious adverse events**

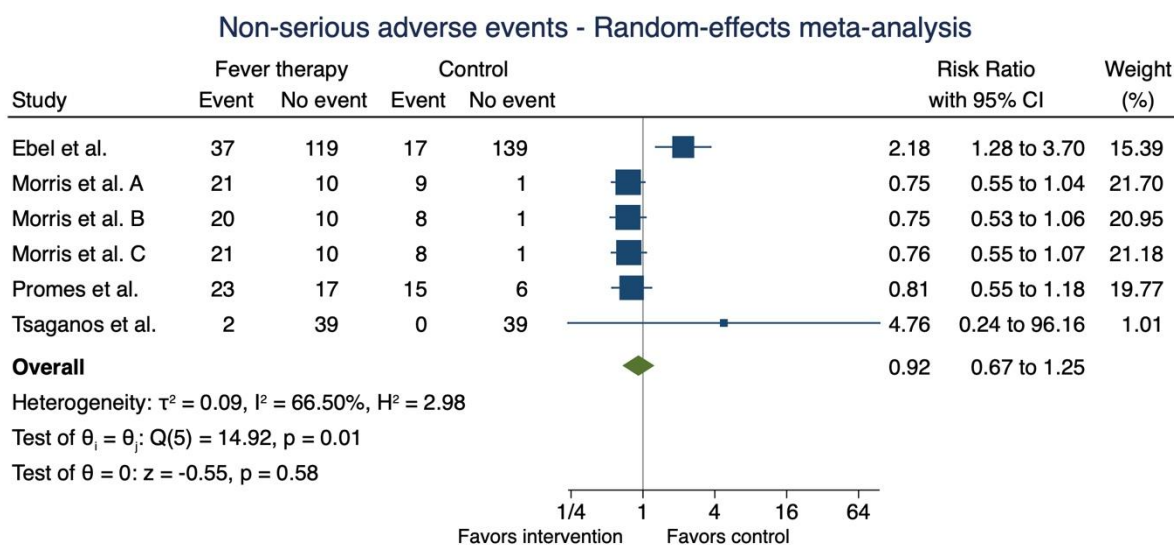

Random-effects DerSimonian-Laird model

Random-effects meta-analysis showed no evidence of a difference between fever control interventions and control interventions on non-serious adverse events (RR 0.92; 95% CI 0.67 to 1.25;  $p = 0.58$ ;  $I^2 = 66.50\%$ ; four trials).

RR: Risk ratio

CI: Confidence interval

$I^2$ : Measure of heterogeneity

**Figure S21: Trial sequential analysis of fever therapy versus control interventions on non-serious adverse events**

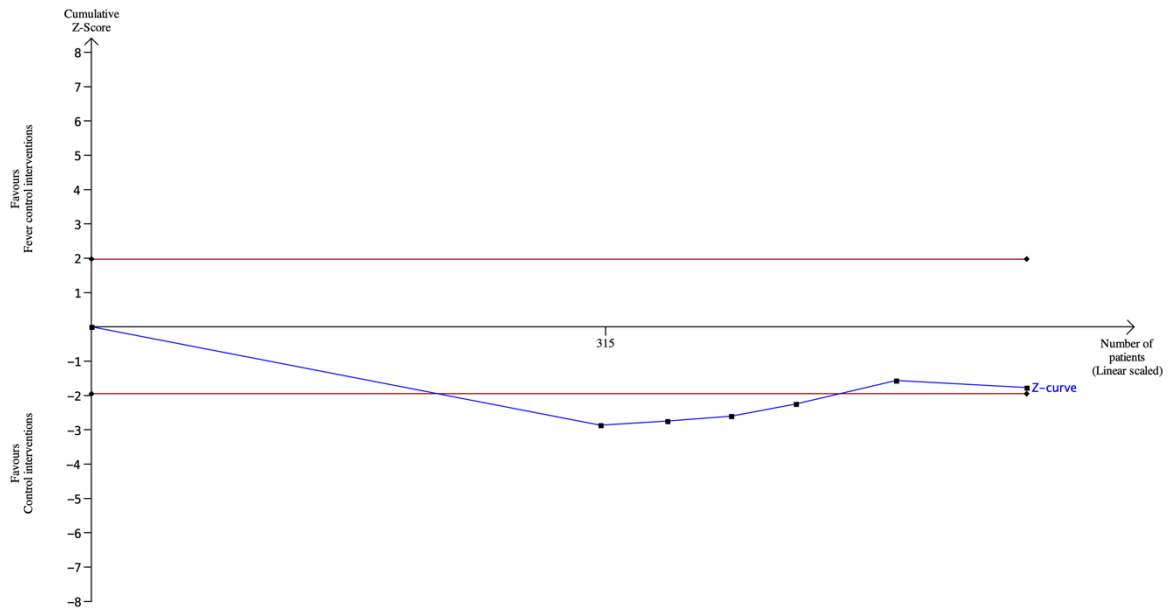

Two-sided trial sequential analysis graph of fever control interventions versus control interventions on non-serious adverse events in 4 trials. The diversity-adjusted required information size (DARIS) was calculated based on an all-cause mortality proportion in the control group ( $P_c$ ) of 23.4 %, relative risk reduction (RRR) of 25 % in the experimental group, type I error (alpha) of 2 %, and type II error (beta) of 10 % (90% power). Diversity was 81 %. The required information size was calculated to be 13158 participants. The cumulative Z-curve (blue line) did not cross the trial sequential monitoring boundaries for neither benefit nor harm. The cumulative Z-curve did not cross the inner-wedge futility line (red outward sloping lines). The dark red lines show the conventional boundary (alpha 5%).



**Figure S22: Fixed-effects meta-analysis of fever therapy versus control interventions on non-serious adverse events**

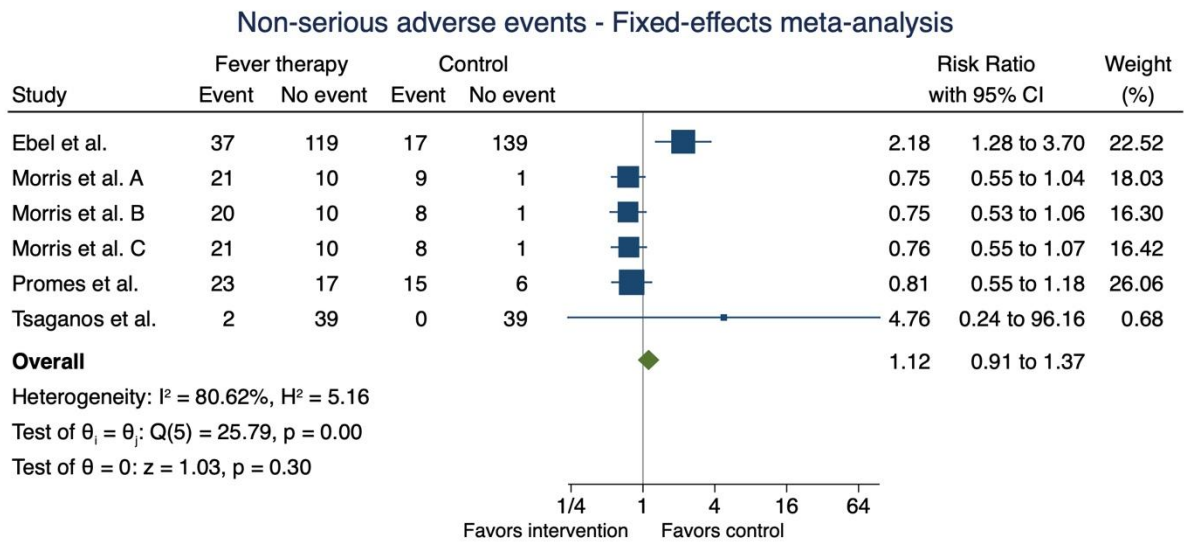

Fixed-effects Mantel-Haenszel model

Fixed-effects meta-analysis showed no evidence of a difference between fever control interventions and control interventions on non-serious adverse events (RR 1.12; 95% CI 0.91 to 1.37;  $p = 0.30$ ;  $I^2 = 80.62\%$ ; four trials).

RR: Risk ratio

CI: Confidence interval

$I^2$ : Measure of heterogeneity

**Figure S23: Subgroup analysis of non-serious adverse events comparing different intervention types**

Non-serious adverse events - Subgroup analysis comparing different intervention types

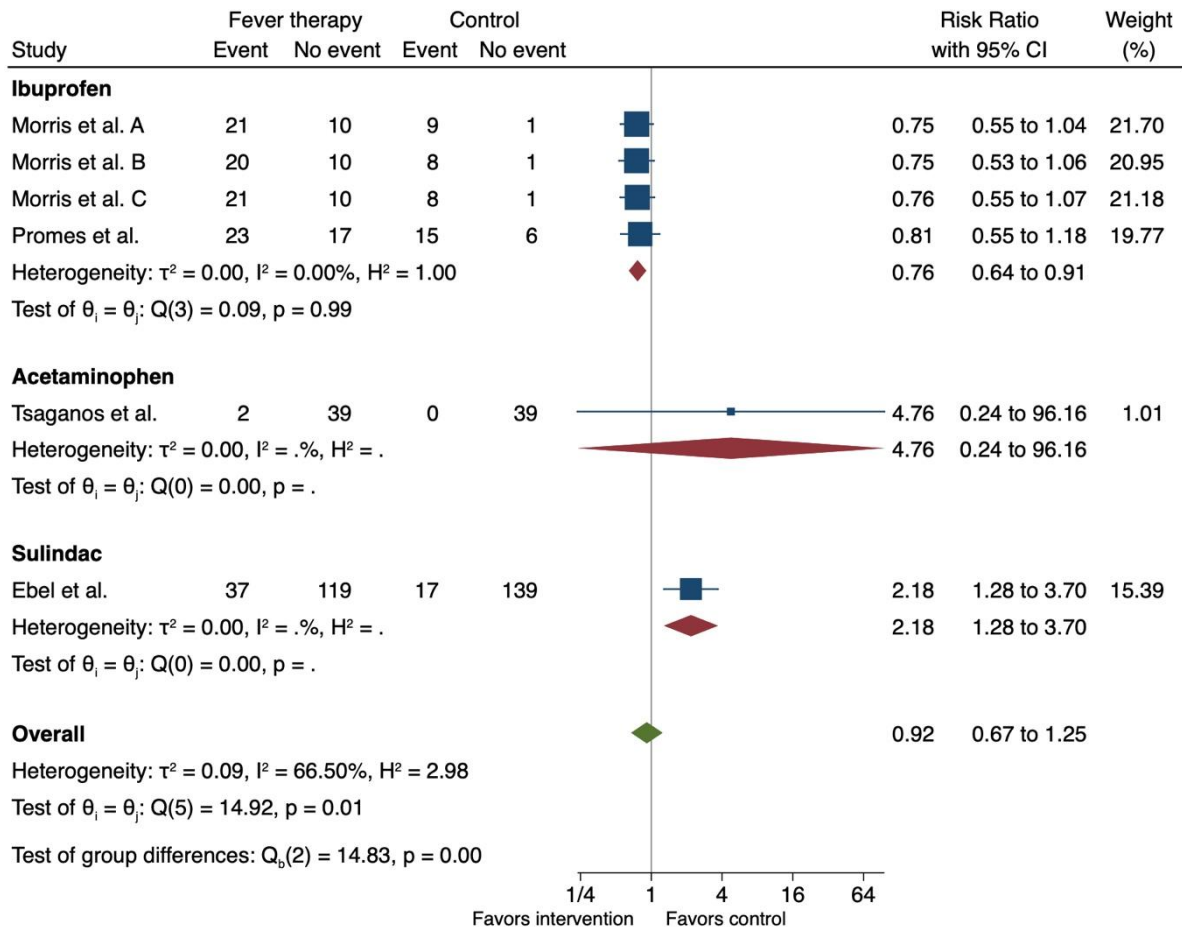

Random-effects DerSimonian-Laird model

Subgroup analysis comparing different intervention types showed evidence of a subgroup difference ( $p = 0.00$ ).

RR: Risk ratio

CI: Confidence interval

$I^2$ : Measure of heterogeneity

**Figure S24: Subgroup analysis of non-serious adverse events comparing critically ill versus non-critically ill**

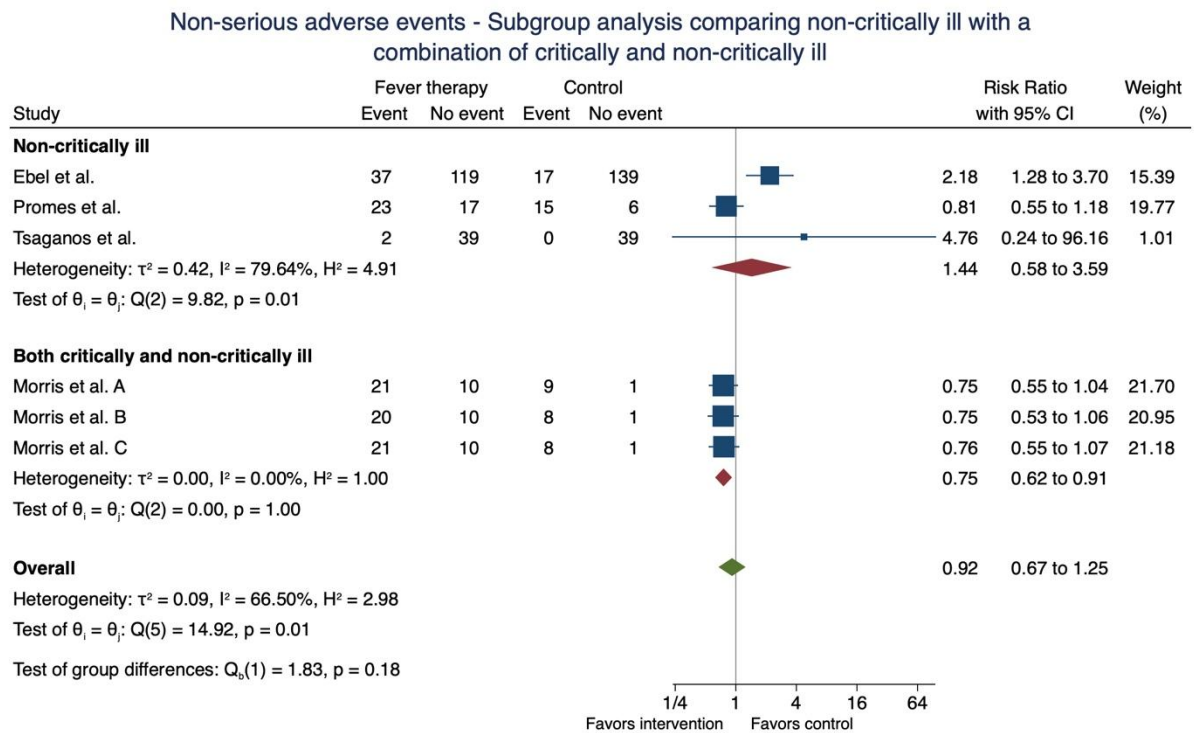

Random-effects DerSimonian-Laird model

Subgroup analysis comparing critically ill with non-critically ill showed no evidence of a subgroup difference ( $p = 0.18$ ).

RR: Risk ratio

CI: Confidence interval

$I^2$ : Measure of heterogeneity

**Figure S25: Subgroup analysis of non-serious adverse events comparing infectious fever with non-infectious fever**

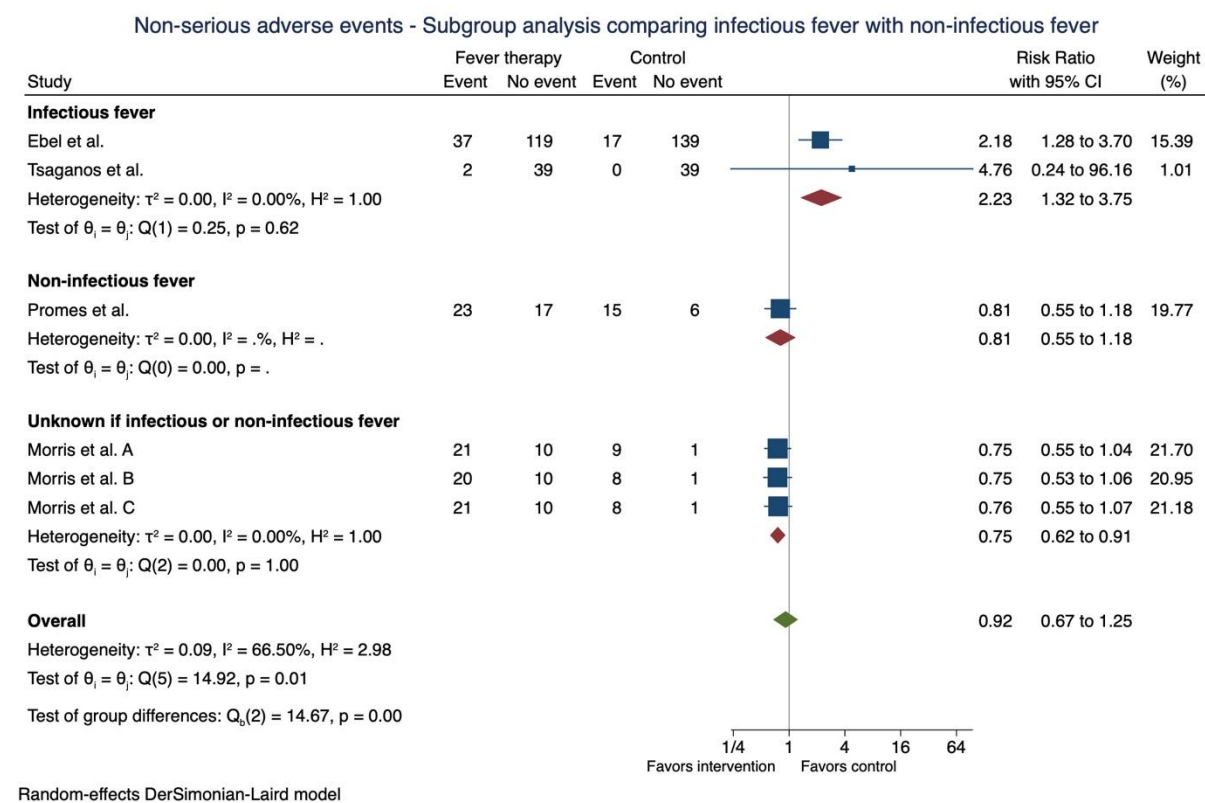

Subgroup analysis comparing infectious fever with non-infectious fever showed evidence of a subgroup difference ( $p = 0.00$ ).

RR: Risk ratio

CI: Confidence interval

$I^2$ : Measure of heterogeneity

**Figure S26: Subgroup analysis of non-serious adverse events comparing different follow-up times**

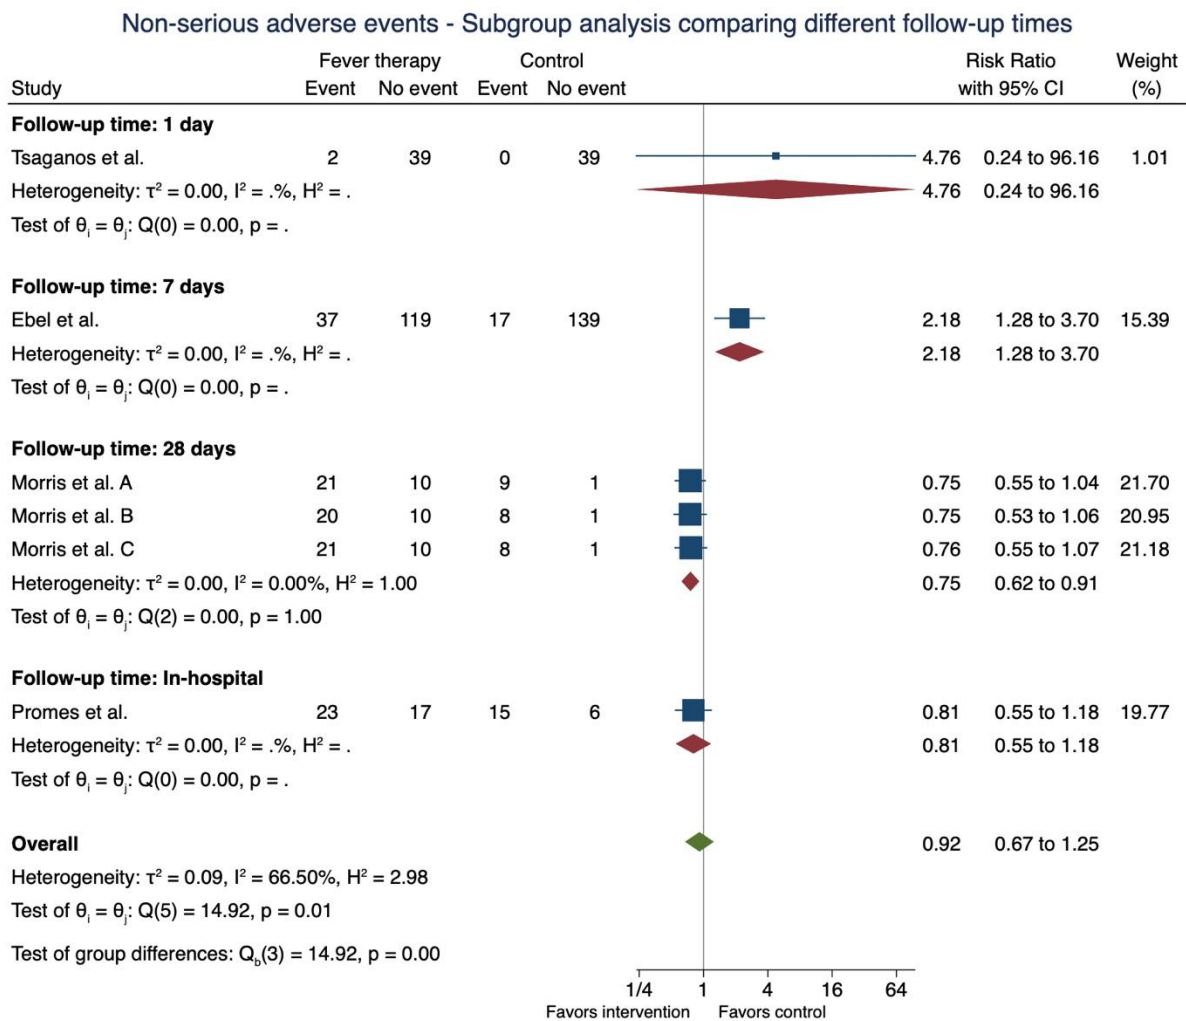

Random-effects DerSimonian-Laird model

Subgroup analysis comparing different follow-up times showed evidence of a subgroup difference ( $p = 0.00$ ).

RR: Risk ratio

CI: Confidence interval

$I^2$ : Measure of heterogeneity

**Figure S27: Subgroup analysis of non-serious adverse events comparing trials with for-profit bias with trials without for-profit bias**

Non-serious adverse events - Subgroup analysis comparing trials with for-profit bias with trials with no for-profit bias

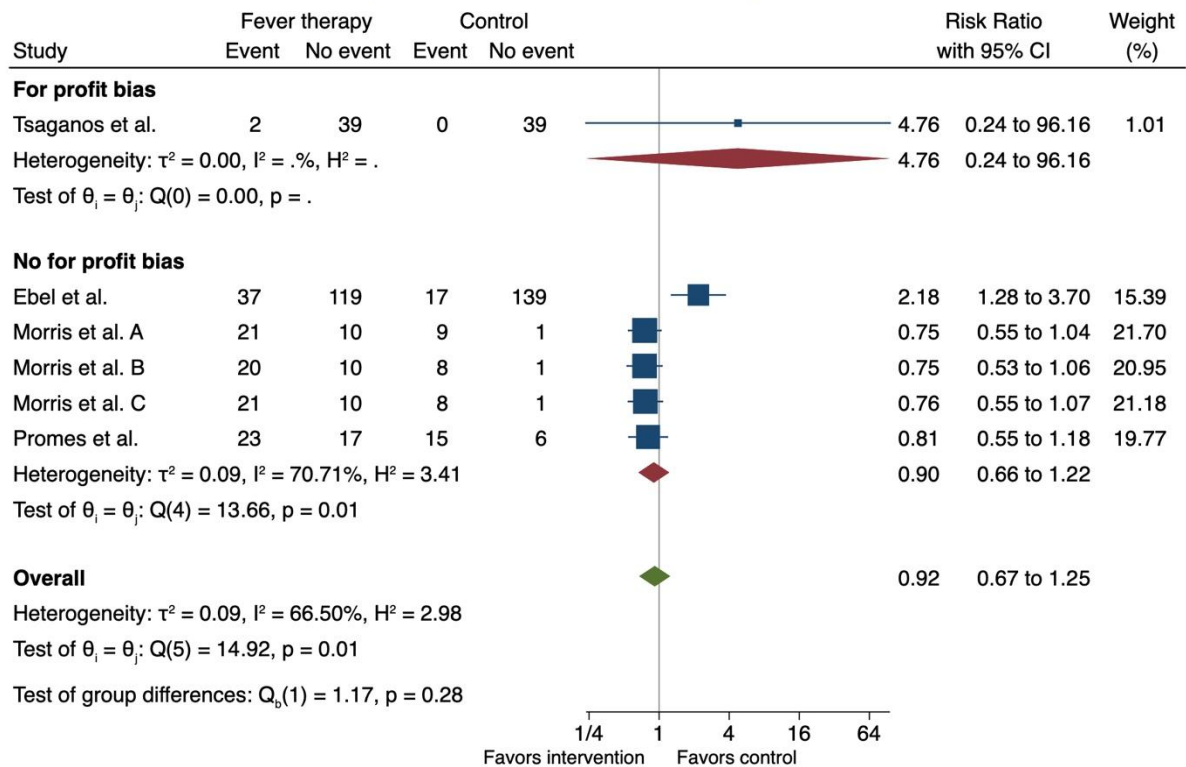

Random-effects DerSimonian-Laird model

Subgroup analysis comparing trials with for profit bias with trials without for profit showed no evidence of a subgroup difference ( $p = 0.28$ ).

RR: Risk ratio

CI: Confidence interval

$I^2$ : Measure of heterogeneity

# Tables

**Table S1: Characteristics of included trials**

| Trial ID                                | Intervention                                               | Control                        | Number of participants | Critically ill (Yes/No/Both) | Infectious fever (Yes/No/Unknown) | All-cause mortality (Intervention / Control) | Serious adverse events (Intervention / Control) | Non-serious adverse events (Intervention / Control) | Quality of life | Temperature change p-value* |
|-----------------------------------------|------------------------------------------------------------|--------------------------------|------------------------|------------------------------|-----------------------------------|----------------------------------------------|-------------------------------------------------|-----------------------------------------------------|-----------------|-----------------------------|
| Azuma et al. A <sup>41</sup>            | Zaltoprofen                                                | Placebo                        | 131                    | No                           | Yes                               | N/A                                          | N/A                                             | N/A                                                 | N/A             | <0.001                      |
| Azuma et al. B <sup>41</sup>            | Loxoprofen                                                 | Placebo                        | 131                    | No                           | Yes                               | N/A                                          | N/A                                             | N/A                                                 | N/A             | <0.001                      |
| Bachert et al. A <sup>42</sup>          | Acetylsalicylic acid 500mg                                 | Placebo                        | 97                     | No                           | Yes                               | N/A                                          | N/A                                             | N/A                                                 | N/A             | <0.001                      |
| Bachert et al. B <sup>42</sup>          | Acetylsalicylic acid 1000mg                                | Placebo                        | 97                     | No                           | Yes                               | N/A                                          | N/A                                             | N/A                                                 | N/A             | <0.001                      |
| Bachert et al. C <sup>42</sup>          | Acetaminophen 500mg                                        | Placebo                        | 99                     | No                           | Yes                               | N/A                                          | N/A                                             | N/A                                                 | N/A             | <0.001                      |
| Bachert et al. D <sup>42</sup>          | Acetaminophen 1000mg                                       | Placebo                        | 99                     | No                           | Yes                               | N/A                                          | N/A                                             | N/A                                                 | N/A             | <0.001                      |
| Bernard et al. <sup>43</sup>            | Ibuprofen                                                  | Placebo                        | 455                    | Yes                          | Yes                               | 70/200 / 74/211                              | 70/200 / 74/211                                 | N/A                                                 | N/A             | <0.001                      |
| DeMartini et al. <sup>44</sup>          | Physical cooling                                           | No intervention                | 16                     | No                           | No                                | N/A                                          | N/A                                             | N/A                                                 | N/A             | N/A                         |
| Diringer et al. <sup>45</sup>           | IV-catheter based cooling + standard antipyretic treatment | Standard antipyretic treatment | 238                    | Yes                          | No                                | 34/123 / 21/115                              | 34/123 / 21/115                                 | N/A                                                 | N/A             | <0.001                      |
| Ebel et al. <sup>39</sup>               | Sulindac                                                   | Placebo                        | 312                    | No                           | Yes                               | N/A                                          | N/A                                             | 37/156 / 17/156                                     | N/A             | <0.001                      |
| Fankhauser et al. A <sup>46</sup>       | Acetylsalicylic acid 1000mg                                | Placebo                        | 32                     | No                           | Unknown                           | N/A                                          | N/A                                             | N/A                                                 | N/A             | <0.001                      |
| Fankhauser et al. B <sup>46</sup>       | Fluproquazone                                              | Placebo                        | 27                     | No                           | Unknown                           | N/A                                          | N/A                                             | N/A                                                 | N/A             | <0.001                      |
| Focan et al. <sup>47</sup>              | Suprofen                                                   | Placebo                        | 61                     | Both                         | Unknown                           | N/A                                          | N/A                                             | N/A                                                 | N/A             | <0.05                       |
| Gehanno et al. A <sup>48</sup>          | 6.25mg Diclofenac                                          | Placebo                        | 135                    | No                           | Yes                               | N/A                                          | N/A                                             | N/A                                                 | N/A             | <=0.05                      |
| Gehanno et al. B <sup>48</sup>          | 12.5mg Diclofenac                                          | Placebo                        | 135                    | No                           | Yes                               | N/A                                          | N/A                                             | N/A                                                 | N/A             | <0.01                       |
| Gehanno et al. C <sup>48</sup>          | 25mg Diclofenac                                            | Placebo                        | 139                    | No                           | Yes                               | N/A                                          | N/A                                             | N/A                                                 | N/A             | <0.01                       |
| Gehanno et al. D <sup>48</sup>          | 1000mg Acetaminophen                                       | Placebo                        | 134                    | No                           | Yes                               | N/A                                          | N/A                                             | N/A                                                 | N/A             | <=0.05                      |
| Gozzoli, Schöttker et al. <sup>49</sup> | External cooling                                           | No antipyretic treatment       | 38                     | Yes                          | Unknown                           | 2/18 / 3/20                                  | 2/18 / 3/20                                     | N/A                                                 | N/A             | >0.05                       |

|                                             |                                      |                            |     |      |         |             |             |              |     |          |
|---------------------------------------------|--------------------------------------|----------------------------|-----|------|---------|-------------|-------------|--------------|-----|----------|
| <b>Grebe et al. A</b> <sup>50</sup>         | Diclofenac                           | Placebo                    | 179 | No   | Yes     | N/A         | N/A         | N/A          | N/A | <0.001   |
| <b>Grebe et al. B</b> <sup>50</sup>         | Ibuprofen                            | Placebo                    | 177 | No   | Yes     | N/A         | N/A         | N/A          | N/A | <0.001   |
| <b>Hagobian et al.</b> <sup>51</sup>        | Physical cooling                     | No intervention            | 6   | No   | No      | N/A         | N/A         | N/A          | N/A | N/A      |
| <b>Henker et al. A</b> <sup>52</sup>        | Antipyretics and physical cooling    | Antipyretics               | 8   | Yes  | Unknown | N/A         | N/A         | N/A          | N/A | >0.05    |
| <b>Henker et al. B</b> <sup>52</sup>        | Antipyretics and physical cooling    | Cooling                    | 9   | Yes  | Unknown | N/A         | N/A         | N/A          | N/A | >0.05    |
| <b>Honarmand et al.</b> <sup>53</sup>       | Intravenous Acetaminophen            | No antipyretic treatment   | 20  | Yes  | Unknown | 2/10 / 3/10 | 2/10 / 3/10 | N/A          | N/A | >0.05    |
| <b>Hosokawa et al.</b> <sup>54</sup>        | Physical cooling                     | No intervention            | 14  | No   | No      | N/A         | N/A         | N/A          | N/A | N/A      |
| <b>Hosokawa et al.</b> <sup>55</sup>        | Physical cooling                     | No intervention            | 14  | No   | No      | N/A         | N/A         | N/A          | N/A | N/A      |
| <b>Kett et al.</b> <sup>56</sup>            | Acetaminophen IV                     | Placebo                    | 60  | Both | No      | N/A         | N/A         | N/A          | N/A | p=0.0376 |
| <b>Krudsod et al.</b> <sup>57</sup>         | IV ibuprofen                         | Placebo                    | 60  | No   | Yes     | N/A         | N/A         | N/A          | N/A | p=0.0019 |
| <b>Lissoway et al.</b> <sup>58</sup>        | Physical cooling                     | No intervention            | 10  | No   | No      | N/A         | N/A         | N/A          | N/A | N/A      |
| <b>Lopez et al.</b> <sup>59</sup>           | Cooling vest                         | Passive cooling            | 10  | No   | No      | N/A         | N/A         | N/A          | N/A | >0.05    |
| <b>Luhring et al.</b> <sup>60</sup>         | Physical cooling                     | No intervention            | 16  | No   | No      | N/A         | N/A         | N/A          | N/A | N/A      |
| <b>Mayer et al.</b> <sup>62</sup>           | Acetaminophen + air blanket          | Acetaminophen              | 220 | Yes  | No      | N/A         | N/A         | N/A          | N/A | >0.05    |
| <b>Morgan et al. A</b> <sup>40</sup>        | Hypothermia blanket + acetaminophen  | Acetaminophen              | 11  | Yes  | No      | N/A         | N/A         | N/A          | N/A | >0.05    |
| <b>Morgan et al. B</b> <sup>40</sup>        | Tepid water sponging + acetaminophen | Acetaminophen              | 10  | Yes  | No      | N/A         | N/A         | N/A          | N/A | >0.05    |
| <b>Morris et al. A</b> <sup>36</sup>        | 100 mg IV ibuprofen                  | Placebo                    | 41  | Both | Unknown | 1/31 / 1/10 | 6/31 / 2/10 | 27/31 / 9/10 | N/A | <0.05    |
| <b>Morris et al. B</b> <sup>36</sup>        | 200mg IV ibuprofen                   | Placebo                    | 39  | Both | Unknown | 2/30 / 0/9  | 5/30 / 1/9  | 25/30 / 8/9  | N/A | <0.05    |
| <b>Morris et al. C</b> <sup>36</sup>        | 400mg IV ibuprofen                   | Placebo                    | 40  | Both | Unknown | 2/31 / 0/9  | 4/31 / 1/9  | 23/31 8/9    | N/A | <0.001   |
| <b>Mullins et al. A</b> <sup>61</sup>       | Acetaminophen + ibuprofen            | ibuprofen                  | 38  | Yes  | No      | N/A         | N/A         | N/A          | N/A | >0.05    |
| <b>Mullins et al. B</b> <sup>61</sup>       | Acetaminophen + ibuprofen            | Acetaminophen              | 41  | Yes  | No      | N/A         | N/A         | N/A          | N/A | 0.03     |
| <b>Niven et al.</b> <sup>62</sup>           | Aggressive fever treatment           | Permissive fever treatment | 26  | Yes  | Unknown | 3/14 / 2/12 | 3/14 / 2/12 | N/A          | N/A | 0.02     |
| <b>Pernerstorfer et al. A</b> <sup>63</sup> | Aspirin                              | Placebo                    | 15  | No   | No      | N/A         | N/A         | N/A          | N/A | 0.001    |



|                                                 |                                 |                                 |     |     |         |                 |                 |               |     |         |
|-------------------------------------------------|---------------------------------|---------------------------------|-----|-----|---------|-----------------|-----------------|---------------|-----|---------|
| <b>Pernerstorfer et al. B</b> <sup>63</sup>     | Acetaminophen                   | Placebo                         | 15  | No  | No      | N/A             | N/A             | N/A           | N/A | 0.001   |
| <b>Promes et al.</b> <sup>37</sup>              | ibuprofen                       | Placebo                         | 61  | No  | No      | 3/40 / 2/21     | 6/40 / 6/21     | 23/40 / 15/21 | N/A | <0.05   |
| <b>Salgado et al. A</b> <sup>64</sup>           | Ice-packs + antipyretics        | Antipyretics                    | 51  | Yes | Unknown | 13/34 / 7/17    | 13/34 / 7/17    | N/A           | N/A | >0.05   |
| <b>Salgado et al. B</b> <sup>64</sup>           | Warm compress + antipyretics    | Antipyretics                    | 51  | Yes | Unknown | 11/34 / 6/17    | 11/34 / 6/17    | N/A           | N/A | >0.05   |
| <b>Schell-Chaple et al.</b> <sup>65</sup>       | Acetaminophen                   | Placebo                         | 40  | Yes | Unknown | N/A             | N/A             | N/A           | N/A | 0.05    |
| <b>Schortgen, Clabault et al.</b> <sup>66</sup> | External cooling                | No external cooling             | 200 | Yes | Yes     | 43/101 / 48/99  | 43/101 / 48/99  | N/A           | N/A | <0.01   |
| <b>Schulman et al.</b> <sup>67</sup>            | Aggressive antipyretic protocol | Permissive antipyretic protocol | 82  | Yes | Unknown | 7/44 / 1/38     | 7/44 / 1/38     | N/A           | N/A | <0.0001 |
| <b>Schwartz et al. A</b> <sup>68</sup>          | Rofecoxib 12.5mg                | Placebo                         | 33  | No  | Unknown | N/A             | N/A             | N/A           | N/A | <0.05   |
| <b>Schwartz et al. B</b> <sup>68</sup>          | Rofecoxib 25mg                  | Placebo                         | 31  | No  | Unknown | N/A             | N/A             | N/A           | N/A | <0.05   |
| <b>Schwartz et al. C</b> <sup>68</sup>          | Ibuprofen 400mg                 | Placebo                         | 30  | No  | Unknown | N/A             | N/A             | N/A           | N/A | <0.05   |
| <b>Tan et al.</b> <sup>69</sup>                 | Physical cooling                | No intervention                 | 22  | No  | No      | N/A             | N/A             | N/A           | N/A | N/A     |
| <b>Tsaganos et al.</b> <sup>38</sup>            | Acetaminophen                   | Placebo                         | 80  | No  | Yes     | 2/41 / 0/39     | 2/41 / 0/39     | 2/41 / 0/39   | N/A | 0.003   |
| <b>Vargas et al. A</b> <sup>70</sup>            | Keterolac 60mg IM               | Placebo IM                      | 40  | No  | No      | N/A             | N/A             | N/A           | N/A | <0.0001 |
| <b>Vargas et al. B</b> <sup>70</sup>            | Keterolac 30mg IM               | Placebo IM                      | 38  | No  | No      | N/A             | N/A             | N/A           | N/A | <0.0001 |
| <b>Vargas et al. C</b> <sup>70</sup>            | Keterolac 15mg IM               | Placebo IM                      | 38  | No  | No      | N/A             | N/A             | N/A           | N/A | 0.0006  |
| <b>Vargas et al. D</b> <sup>70</sup>            | Acetaminophen 650mg PO          | Placebo PO                      | 38  | No  | No      | N/A             | N/A             | N/A           | N/A | <0.0001 |
| <b>Vasikasin et al.</b> <sup>71</sup>           | Acetaminophen                   | Placebo                         | 86  | No  | Yes     | 0/48 / 0/40     | 0/48 / 0/40     | N/A           | N/A | >0.05   |
| <b>Weinkove et al.</b> <sup>35</sup>            | Acetaminophen                   | Placebo                         | 22  | No  | Yes     | 0/13 / 2/9      | 0/13 / 2/9      | N/A           | Yes | >0.05   |
| <b>Yang et al.</b> <sup>72</sup>                | Aggressive antipyretic protocol | Permissive antipyretic protocol | 65  | Yes | Unknown | 21/34 / 8/31    | 9/22 / 9/32     | N/A           | N/A | <0.0001 |
| <b>Young P et al.</b> <sup>73</sup>             | Acetaminophen                   | Placebo                         | 690 | Yes | Yes     | 55/346 / 57/344 | 55/346 / 57/344 | N/A           | N/A | <0.001  |
| <b>Young P.J. et al.</b> <sup>74</sup>          | Aggressive antipyretic protocol | Permissive antipyretic protocol | 168 | Yes | No      | 23/89 / 23/89   | 23/89 / 23/89   | N/A           | N/A | 0.01    |

Table 2: Characteristics of included trials.

\*p-value for trialist defined temperature difference between fever therapy group and control group. A p-value below or equal to 0.05 represents a significantly lower temperature in the fever therapy group.

**Table S2: Summary of serious adverse events in the included trials**

| Trial                             | Comparison                                          | Fever therapy group                                                                             |                                                         | Control group                                                                     |                                                         |
|-----------------------------------|-----------------------------------------------------|-------------------------------------------------------------------------------------------------|---------------------------------------------------------|-----------------------------------------------------------------------------------|---------------------------------------------------------|
|                                   |                                                     | Number and type of serious adverse event                                                        | Proportion of participants with a serious adverse event | Number and type of serious adverse event                                          | Proportion of participants with a serious adverse event |
| <b>Bernard et al.</b>             | Ibuprofen vs placebo                                | 70 deaths                                                                                       | 70/200                                                  | 70 deaths                                                                         | 74/211                                                  |
| <b>Diringer et al.</b>            | Physical cooling + antipyretics vs antipyretics     | 34 deaths                                                                                       | 34/123                                                  | 34 deaths                                                                         | 21/115                                                  |
| <b>Gozzoli, Schöttker et al.</b>  | Physical cooling vs no intervention                 | 2 deaths                                                                                        | 2/18                                                    | 3 deaths                                                                          | 3/20                                                    |
| <b>Honarmand et al.</b>           | Acetaminophen vs no intervention                    | 2 deaths                                                                                        | 2/10                                                    | 3 deaths                                                                          | 3/10                                                    |
| <b>Morris et al. A</b>            | Ibuprofen vs placebo                                | Not stated                                                                                      | 6/31                                                    | Not stated                                                                        | 2/10                                                    |
| <b>Morris et al. B</b>            | Ibuprofen vs placebo                                | Not stated                                                                                      | 5/30                                                    | Not stated                                                                        | 1/9                                                     |
| <b>Morris et al. C</b>            | Ibuprofen vs placebo                                | Not stated                                                                                      | 4/31                                                    | Not stated                                                                        | 1/9                                                     |
| <b>Niven et al.</b>               | Acetaminophen + physical cooling vs no intervention | 3 deaths                                                                                        | 3/14                                                    | 2 deaths                                                                          | 2/12                                                    |
| <b>Promes et al.</b>              | Ibuprofen vs placebo                                | 1 ARDS, 1 tachypnea, 1 septic shock, 1 septicemia, 1 invasive wound sepsis and 1 breathlessness | 6/40                                                    | 2 ARDs, 1 cardiac arrest, 1 cardiopulmonary arrest, 1 tachypnea and 1 hypotension | 6/21                                                    |
| <b>Salgado et al. A</b>           | Physical cooling + antipyretics vs antipyretics     | 13 deaths                                                                                       | 13/34                                                   | 7 deaths                                                                          | 7/17                                                    |
| <b>Salgado et al. B</b>           | Physical cooling + antipyretics vs antipyretics     | 11 deaths                                                                                       | 11/34                                                   | 6 deaths                                                                          | 6/17                                                    |
| <b>Schortgen, Clabault et al.</b> | Physical cooling vs no intervention                 | 43 deaths                                                                                       | 43/101                                                  | 48 deaths                                                                         | 48/99                                                   |
| <b>Schulman et al.</b>            | Acetaminophen + physical cooling vs no intervention | 7 deaths                                                                                        | 7/44                                                    | 1 death                                                                           | 1/38                                                    |
| <b>Tsaganos et al.</b>            | Acetaminophen vs placebo                            | 2 deaths                                                                                        | 2/41                                                    | No serious adverse events                                                         | 0/39                                                    |
| <b>Vasikasin et al.</b>           | Acetaminophen vs placebo                            | No serious adverse events                                                                       | 0/48                                                    | No serious adverse events                                                         | 0/40                                                    |
| <b>Weinkove et al.</b>            | Acetaminophen vs                                    | No serious adverse events                                                                       | 0/13                                                    | 2 deaths                                                                          | 2/7                                                     |
| <b>Yang et al.</b>                | Physical cooling vs no intervention                 | 21 deaths                                                                                       | 21/34                                                   | 8 deaths                                                                          | 8/31                                                    |
| <b>Young P et al.</b>             | Acetaminophen vs placebo                            | 55 deaths                                                                                       | 55/346                                                  | 57 deaths                                                                         | 57/344                                                  |
| <b>Young P.J. et al.</b>          | Acetaminophen vs no intervention                    | 23 deaths                                                                                       | 23/89                                                   | 23 deaths                                                                         | 23/89                                                   |

**Table S3: Summary of findings table of fever therapy versus control interventions**

**Fever therapy compared with no fever therapy for adults with fever**

**Patients or population:** Adults diagnosed with fever of any origin

**Setting:** Any setting

**Intervention:** Any type of fever therapy (antipyretics or physical cooling)

**Comparison:** No fever therapy (with or without placebo/sham)

| Outcome                                                             | Anticipated absolute effects* (95% CI) |                                      | Relative effect (95% CI) | No of participants (studies) | Certainty of the evidence (GRADE) | Comments |
|---------------------------------------------------------------------|----------------------------------------|--------------------------------------|--------------------------|------------------------------|-----------------------------------|----------|
|                                                                     | Risk with control                      | Risk with intervention               |                          |                              |                                   |          |
| <b>All-cause mortality</b><br><i>Follow-up mean: 25 days</i>        | 226 per 1,000                          | <b>235 per 1,000</b><br>(203 to 269) | RR: 1.04 (0.90 to 1.19)  | 2415<br>(16 RCT)             | ⊕⊕⊕⊕<br>HIGH                      | -        |
| <b>Serious adverse events</b><br><i>Follow-up mean: 25 days</i>     | 242 per 1,000                          | <b>247 per 1,000</b><br>(215 to 283) | RR: 1.02 (0.89 to 1.17)  | 2415<br>(16 RCT)             | ⊕⊕⊕⊕<br>HIGH                      | -        |
| <b>Non-serious adverse events</b><br><i>Follow-up mean: 18 days</i> | 234 per 1,000                          | <b>215 per 1,000</b><br>(157 to 293) | RR: 0.92 (0.67 to 1.25)  | 767<br>(4 RCT)               | ⊕○○○<br>VERY LOW <sup>a,b,c</sup> | -        |

\*The risk in the intervention group (and its 95% confidence interval) is based on the assumed risk in the comparison group and the relative effect of the intervention (and its 95% CI).

RR: Risk ratio CI: Confidence interval; GRADE: GRADE Working Group grades of evidence

**GRADE Working Group grades of evidence**

**High certainty:** We are very confident that the true effect lies close to that of the estimate of the effect

**Moderate certainty:** We are moderately confident in the effect estimate: The true effect is likely to be close to the estimate of the effect, but there is a possibility that it is substantially different

**Low certainty:** Our confidence in the effect estimate is limited: The true effect may be substantially different from the estimate of the effect

**Very low certainty:** We have very little confidence in the effect estimate: The true effect is likely to be substantially different from the estimate of effect

**Explanations**

a. Downgraded 2 for risk of bias

b. Downgraded 2 for imprecision due to Trial Sequential Analysis showing no crossing of TSA-monitoring boundaries and insufficient number of participants

c. Downgraded 1 for inconsistency due to large heterogeneity

## References

1. Sethi N, Naqash AI, Nielsen N, Jakobsen JC. Fever control interventions versus placebo, sham or no intervention in adults: a protocol for a systematic review with meta-analysis and Trial Sequential Analysis. *BMJ Open* 2019; **9**(11): e032389.
2. International Conference on Harmonisation of Technical Requirements for Registration of Pharmaceuticals for Human Use (ICH) adopts Consolidated Guideline on Good Clinical Practice in the Conduct of Clinical Trials on Medicinal Products for Human Use. *Int Dig Health Legis* 1997; **48**(2): 231-4.
3. Lefebvre C, Manheimer E, Glanville J, Higgins J, Green S. Cochrane handbook for systematic reviews of interventions version 5.1. 0 [updated March 2011]. Available at [www.cochrane-handbook.org](http://www.cochrane-handbook.org) 2011.
4. Sterne JAC SJ, Page MJ, Elbers RG, Blencowe NS, Boutron I, et al. RoB 2: a revised tool for assessing risk of bias in randomised trials. *BMJ* 2019;366:I4898. <https://www.bmj.com/content/366/bmj.I4898>.
5. Gluud LL. Bias in clinical intervention research. *Am J Epidemiol* 2006; **163**(6): 493-501.
6. Kjaergard LL, Villumsen J, Gluud C. Reported methodologic quality and discrepancies between large and small randomized trials in meta-analyses. *Ann Intern Med* 2001; **135**(11): 982-9.
7. Lundh A, Lexchin J, Mintzes B, Schroll JB, Bero L. Industry sponsorship and research outcome. *Cochrane Database Syst Rev* 2017; **2**(2): Mr000033.
8. Moher D, Pham B, Jones A, et al. Does quality of reports of randomised trials affect estimates of intervention efficacy reported in meta-analyses? *Lancet* 1998; **352**(9128): 609-13.
9. Savović J, Jones H, Altman D, et al. Influence of reported study design characteristics on intervention effect estimates from randomised controlled trials: combined analysis of meta-epidemiological studies. *Health Technol Assess* 2012; **16**(35): 1-82.
10. Schulz KF, Chalmers I, Hayes RJ, Altman DG. Empirical evidence of bias. Dimensions of methodological quality associated with estimates of treatment effects in controlled trials. *Jama* 1995; **273**(5): 408-12.
11. Wood L, Egger M, Gluud LL, et al. Empirical evidence of bias in treatment effect estimates in controlled trials with different interventions and outcomes: meta-epidemiological study. *Bmj* 2008; **336**(7644): 601-5.
12. Mayer S, Commichau C, Scarmeas N, Presciutti M, Bates J, Copeland D. Clinical trial of an air-circulating cooling blanket for fever control in critically ill neurologic patients. *Neurology* 2001; **56**(3): 292-8.
13. Thorlund KEJ, Wetterslev J, Brok J, et al. . User manual for trial sequential analysis (TSA), 2011. Available: [http://www.ctu.dk/tsa/files/tsa\\_manual.pdf](http://www.ctu.dk/tsa/files/tsa_manual.pdf).
14. StataCorp Stata: release 15. statistical software. College Station, TX: StataCorp LP; 2017.
15. Higgins JP, Thompson SG. Quantifying heterogeneity in a meta-analysis. *Stat Med* 2002; **21**(11): 1539-58.
16. Higgins JP, Thompson SG, Deeks JJ, Altman DG. Measuring inconsistency in meta-analyses. *Bmj* 2003; **327**(7414): 557-60.
17. Keus F, Wetterslev J, Gluud C, van Laarhoven CJ. Evidence at a glance: error matrix approach for overviewing available evidence. *BMC Med Res Methodol* 2010; **10**: 90.

18. Jakobsen JC, Wetterslev J, Winkel P, Lange T, Gluud C. Thresholds for statistical and clinical significance in systematic reviews with meta-analytic methods. *BMC Med Res Methodol* 2014; **14**: 120.
19. Demets DL. Methods for combining randomized clinical trials: strengths and limitations. *Stat Med* 1987; **6**(3): 341-50.
20. DerSimonian R, Laird N. Meta-analysis in clinical trials. *Control Clin Trials* 1986; **7**(3): 177-88.
21. Wetterslev J, Thorlund K, Brok J, Gluud C. Trial sequential analysis may establish when firm evidence is reached in cumulative meta-analysis. *J Clin Epidemiol* 2008; **61**(1): 64-75.
22. Copenhagen Trial Unit TSA - Trial Sequential Analysis. Available: <http://www.ctu.dk/tsa/>.
23. Wetterslev J, Jakobsen JC, Gluud C. Trial Sequential Analysis in systematic reviews with meta-analysis. *BMC Med Res Methodol* 2017; **17**(1): 39.
24. Imberger G, Thorlund K, Gluud C, Wetterslev J. False-positive findings in Cochrane meta-analyses with and without application of trial sequential analysis: an empirical review. *BMJ Open* 2016; **6**(8): e011890.
25. Imberger G, Gluud C, Boylan J, Wetterslev J. Systematic Reviews of Anesthesiologic Interventions Reported as Statistically Significant: Problems with Power, Precision, and Type 1 Error Protection. *Anesth Analg* 2015; **121**(6): 1611-22.
26. Thorlund K, Anema A, Mills E. Interpreting meta-analysis according to the adequacy of sample size. An example using isoniazid chemoprophylaxis for tuberculosis in purified protein derivative negative HIV-infected individuals. *Clin Epidemiol* 2010; **2**: 57-66.
27. Wetterslev J, Thorlund K, Brok J, Gluud C. Estimating required information size by quantifying diversity in random-effects model meta-analyses. *BMC Med Res Methodol* 2009; **9**: 86.
28. Thorlund K, Devereaux PJ, Wetterslev J, et al. Can trial sequential monitoring boundaries reduce spurious inferences from meta-analyses? *Int J Epidemiol* 2009; **38**(1): 276-86.
29. Brok J, Thorlund K, Wetterslev J, Gluud C. Apparently conclusive meta-analyses may be inconclusive--Trial sequential analysis adjustment of random error risk due to repetitive testing of accumulating data in apparently conclusive neonatal meta-analyses. *Int J Epidemiol* 2009; **38**(1): 287-98.
30. Brok J, Thorlund K, Gluud C, Wetterslev J. Trial sequential analysis reveals insufficient information size and potentially false positive results in many meta-analyses. *J Clin Epidemiol* 2008; **61**(8): 763-9.
31. Turner RM, Bird SM, Higgins JP. The impact of study size on meta-analyses: examination of underpowered studies in Cochrane reviews. *PLoS One* 2013; **8**(3): e59202.
32. Schünemann H, Brozek J, Guyatt G, et al. . Handbook for grading the quality of evidence and the strength of recommendations using the grade approach, 2013. Available: [gdt.guidelinedevelopment.org/app/handbook/handbook.html](http://gdt.guidelinedevelopment.org/app/handbook/handbook.html).
33. Guyatt GH, Oxman AD, Schünemann HJ, Tugwell P, Knottnerus A. GRADE guidelines: a new series of articles in the Journal of Clinical Epidemiology. *J Clin Epidemiol* 2011; **64**(4): 380-2.
34. Guyatt GH, Oxman AD, Vist GE, et al. GRADE: an emerging consensus on rating quality of evidence and strength of recommendations. *Bmj* 2008; **336**(7650): 924-6.
35. Weinkove R, Bowden E, Wood C, et al. A randomized controlled feasibility trial of paracetamol during febrile neutropenia in hemato-oncology patients. *Leuk Lymphoma* 2019; **60**(6): 1540-7.

36. Morris PE, Promes JT, Guntupalli KK, Wright PE, Arons MM. A multi-center, randomized, double-blind, parallel, placebo-controlled trial to evaluate the efficacy, safety, and pharmacokinetics of intravenous ibuprofen for the treatment of fever in critically ill and non-critically ill adults. *Critical Care* 2010; **14**(3): R125.
37. Promes JT, Safcsak K, Pavliv L, Voss B, Rock A. A prospective, multicenter, randomized, double-blind trial of IV ibuprofen for treatment of fever and pain in burn patients. *J Burn Care Res* 2011; **32**(1): 79-90.
38. Tsaganos T, Tseti IK, Tziolos N, et al. Randomized, controlled, multicentre clinical trial of the antipyretic effect of intravenous paracetamol in patients admitted to hospital with infection. *Br J Clin Pharmacol* 2017; **83**(4): 742-50.
39. Ebel DL, Shih WJ, Rhymer AR. A multi-centre, double-blind randomized study to assess the efficacy and tolerance of sulindac versus placebo in the symptomatic treatment of patients with upper respiratory tract infection. *Curr Med Res Opin* 1985; **9**(10): 666-75.
40. Morgan SP. A comparison of three methods of managing fever in the neurologic patient. *J Neurosci Nurs* 1990; **22**(1): 19-24.
41. Azuma A, Kudoh S, Nakashima M, Nagatake T. Antipyretic and analgesic effects of zaltoprofen for the treatment of acute upper respiratory tract infection: verification of a noninferiority hypothesis using loxoprofen sodium. *Pharmacology* 2011; **87**(3-4): 204-13.
42. Bachert C, Chuchalin AG, Eisebitt R, Netayzhenko VZ, Voelker M. Aspirin compared with acetaminophen in the treatment of fever and other symptoms of upper respiratory tract infection in adults: a multicenter, randomized, double-blind, double-dummy, placebo-controlled, parallel-group, single-dose, 6-hour dose-ranging study. *Clin Ther* 2005; **27**(7): 993-1003.
43. Bernard GR, Wheeler AP, Russell JA, et al. The effects of ibuprofen on the physiology and survival of patients with sepsis. The Ibuprofen in Sepsis Study Group. *N Engl J Med* 1997; **336**(13): 912-8.
44. DeMartini JK, Ranalli GF, Casa DJ, et al. Comparison of body cooling methods on physiological and perceptual measures of mildly hyperthermic athletes. *J Strength Cond Res* 2011; **25**(8): 2065-74.
45. Diringer MN. Treatment of fever in the neurologic intensive care unit with a catheter-based heat exchange system. *Crit Care Med* 2004; **32**(2): 559-64.
46. Fankhauser S, Laube W, Marti HR, Schultheiss HR, Vögtlin J, von Graffenried B. Antipyretic activity of fluproquazone in man. *Arzneimittelforschung* 1981; **31**(5a): 934-5.
47. Focan C, Hendrickx P, Meunier-Carpentier F, Servais J, Michos N, Stocker H. Antipyretic effect and tolerability of suprofen suppositories. Controlled clinical double-blind study with placebo. *Arzneimittelforschung* 1985; **35**(11): 1739-41.
48. Gehanno P, Dreiser RL, Ionescu E, Gold M, Liu JM. Lowest effective single dose of diclofenac for antipyretic and analgesic effects in acute febrile sore throat. *Clin Drug Investig* 2003; **23**(4): 263-71.
49. Gozzoli V, Schöttker P, Suter PM, Ricou B. Is it worth treating fever in intensive care unit patients? Preliminary results from a randomized trial of the effect of external cooling. *Arch Intern Med* 2001; **161**(1): 121-3.
50. Grebe W, Ionescu E, Gold MS, Liu JM, Frank WO. A multicenter, randomized, double-blind, double-dummy, placebo- and active-controlled, parallel-group comparison of diclofenac-K and ibuprofen for the treatment of adults with influenza-like symptoms. *Clin Ther* 2003; **25**(2): 444-58.
51. Hagobian TA, Jacobs KA, Kiratli BJ, Friedlander AL. Foot cooling reduces exercise-induced hyperthermia in men with spinal cord injury. *Med Sci Sports Exerc* 2004; **36**(3): 411-7.

52. Henker R, Rogers S, Kramer DJ, Kelso L, Kerr M, Sereika S. Comparison of fever treatments in the critically ill: a pilot study. *Am J Crit Care* 2001; **10**(4): 276-80.
53. Honarmand H, Abdollahi M, Ahmadi A, et al. Randomized trial of the effect of intravenous paracetamol on inflammatory biomarkers and outcome in febrile critically ill adults. *Daru* 2012; **20**(1): 12.
54. Hosokawa Y, Adams WM, Belval LN, Vandermark LW, Casa DJ. Tarp-Assisted Cooling as a Method of Whole-Body Cooling in Hyperthermic Individuals. *Ann Emerg Med* 2017; **69**(3): 347-52.
55. Hosokawa Y, Belval LN, Adams WM, Vandermark LW, Casa DJ. Chemically Activated Cooling Vest's Effect on Cooling Rate Following Exercise-Induced Hyperthermia: A Randomized Counter-Balanced Crossover Study. *Medicina (Kaunas)* 2020; **56**(10).
56. Kett DH, Breitmeyer JB, Ang R, Royal MA. A randomized study of the efficacy and safety of intravenous acetaminophen vs. intravenous placebo for the treatment of fever. *Clin Pharmacol Ther* 2011; **90**(1): 32-9.
57. Krudsood S, Tangpukdee N, Wilairatana P, et al. Intravenous ibuprofen (IV-ibuprofen) controls fever effectively in adults with acute uncomplicated Plasmodium falciparum malaria but prolongs parasitemia. *Am J Trop Med Hyg* 2010; **83**(1): 51-5.
58. Lissoway JB, Lipman GS, Grahn DA, et al. Novel application of chemical cold packs for treatment of exercise-induced hyperthermia: a randomized controlled trial. *Wilderness Environ Med* 2015; **26**(2): 173-9.
59. Lopez RM, Cleary MA, Jones LC, Zuri RE. Thermoregulatory influence of a cooling vest on hyperthermic athletes. *J Athl Train* 2008; **43**(1): 55-61.
60. Luhning KE, Butts CL, Smith CR, et al. Cooling Effectiveness of a Modified Cold-Water Immersion Method After Exercise-Induced Hyperthermia. *J Athl Train* 2016; **51**(11): 946-51.
61. Mullins ME, Empey M, Jaramillo D, Sosa S, Human T, Diringer MN. A prospective randomized study to evaluate the antipyretic effect of the combination of acetaminophen and ibuprofen in neurological ICU patients. *Neurocrit Care* 2011; **15**(3): 375-8.
62. Niven DJ, Stelfox HT, Léger C, Kubes P, Laupland KB. Assessment of the safety and feasibility of administering antipyretic therapy in critically ill adults: a pilot randomized clinical trial. *J Crit Care* 2013; **28**(3): 296-302.
63. Pernerstorfer T, Schmid R, Bieglmayer C, Eichler HG, Kapiotis S, Jilma B. Acetaminophen has greater antipyretic efficacy than aspirin in endotoxemia: a randomized, double-blind, placebo-controlled trial. *Clin Pharmacol Ther* 1999; **66**(1): 51-7.
64. Salgado PO, Silva LC, Silva PM, Chianca TC. Physical methods for the treatment of fever in critically ill patients: a randomized controlled trial. *Rev Esc Enferm USP* 2016; **50**(5): 823-30.
65. Schell-Chaple HM, Liu KD, Matthay MA, Sessler DI, Puntillo KA. Effects of IV Acetaminophen on Core Body Temperature and Hemodynamic Responses in Febrile Critically Ill Adults: A Randomized Controlled Trial. *Crit Care Med* 2017; **45**(7): 1199-207.
66. Schortgen F, Clabault K, Katsahian S, et al. Fever control using external cooling in septic shock: a randomized controlled trial. *Am J Respir Crit Care Med* 2012; **185**(10): 1088-95.
67. Schulman CI, Namias N, Doherty J, et al. The effect of antipyretic therapy upon outcomes in critically ill patients: a randomized, prospective study. *Surg Infect (Larchmt)* 2005; **6**(4): 369-75.
68. Schwartz JI, Chan CC, Mukhopadhyay S, et al. Cyclooxygenase-2 inhibition by rofecoxib reverses naturally occurring fever in humans. *Clin Pharmacol Ther* 1999; **65**(6): 653-60.

69. Tan PM, Teo EY, Ali NB, et al. Evaluation of Various Cooling Systems After Exercise-Induced Hyperthermia. *J Athl Train* 2017; **52**(2): 108-16.
70. Vargas R, Maneatis T, Bynum L, Peterson C, McMahon FG. Evaluation of the antipyretic effect of ketorolac, acetaminophen, and placebo in endotoxin-induced fever. *J Clin Pharmacol* 1994; **34**(8): 848-53.
71. Vasikasin V, Rojdumrongrattana T, Chuerboonchai W, et al. Effect of standard dose paracetamol versus placebo as antipyretic therapy on liver injury in adult dengue infection: a multicentre randomised controlled trial. *Lancet Glob Health* 2019; **7**(5): e664-e70.
72. Yang YL, Liu DW, Wang XT, Long Y, Zhou X, Chai WZ. Body temperature control in patients with refractory septic shock: too much may be harmful. *Chin Med J (Engl)* 2013; **126**(10): 1809-13.
73. Young P, Saxena M, Bellomo R, et al. Acetaminophen for Fever in Critically Ill Patients with Suspected Infection. *N Engl J Med* 2015; **373**(23): 2215-24.
74. Young PJ, Bailey MJ, Bass F, et al. Randomised evaluation of active control of temperature versus ordinary temperature management (REACTOR) trial. *Intensive Care Med* 2019; **45**(10): 1382-91.
